# Supplementary material for: Adsorption of gases on B12N12 and Al12N12 nanocages
Source: Royal Society of Chemistry journal article supplement (doi:10.1039/d3nj05703h), 2024-01-01
Supplement: d3nj05703h1.pdf [file d3nj05703h1.pdf]

## Supporting Information

# Adsorption of Gases on B<sub>12</sub>N<sub>12</sub> and Al<sub>12</sub>N<sub>12</sub> Nanocages

Remya Geetha Sadasivan Nair\*, Arun Kumar Narayanan Nair\*, and Shuyu Sun\*

Physical Science and Engineering Division (PSE), Computational Transport Phenomena Laboratory, King Abdullah University of Science and Technology (KAUST), Thuwal, 23955-6900, Saudi Arabia.

\* To whom correspondence should be addressed

email: [remya.nair@kaust.edu.sa](mailto:remya.nair@kaust.edu.sa); [arun.narayanannair@kaust.edu.sa](mailto:arun.narayanannair@kaust.edu.sa); [shuyu.sun@kaust.edu.sa](mailto:shuyu.sun@kaust.edu.sa)

Table S1. Change in structural parameters due to gas adsorption on B<sub>12</sub>N<sub>12</sub>.

| gas                             | bond angle of gas                   |     | bond length of gas                  |      | bond angle of cage                  |      |
|---------------------------------|-------------------------------------|-----|-------------------------------------|------|-------------------------------------|------|
|                                 | gas/B <sub>12</sub> N <sub>12</sub> | gas | gas/B <sub>12</sub> N <sub>12</sub> | gas  | gas/B <sub>12</sub> N <sub>12</sub> | cage |
| SiH <sub>4</sub>                | 109                                 | 109 | 1.48                                | 1.48 | 125                                 | 125  |
| H <sub>2</sub>                  | -                                   | -   | 0.74                                | 0.74 | 125                                 | 125  |
| Cl <sub>2</sub>                 | -                                   | -   | 2.02                                | 2.02 | 125                                 | 125  |
| F <sub>2</sub>                  | -                                   | -   | 1.37                                | 1.37 | 125                                 | 125  |
| CF <sub>4</sub>                 | 109                                 | 109 | 1.33                                | 1.32 | 125                                 | 125  |
| CH <sub>4</sub>                 | 109                                 | 109 | 1.09                                | 1.09 | 125                                 | 125  |
| CF <sub>2</sub> Cl <sub>2</sub> | 109                                 | 109 | 1.76                                | 1.76 | 125                                 | 125  |
| N <sub>2</sub>                  | -                                   | -   | 1.09                                | 1.09 | 125                                 | 125  |
| CHF <sub>3</sub>                | 110                                 | 110 | 1.33                                | 1.33 | 125                                 | 125  |
| OCS                             | 179                                 | 180 | 1.15                                | 1.15 | 125                                 | 125  |
| N <sub>2</sub> O                | 179                                 | 180 | 1.18                                | 1.18 | 125                                 | 125  |
| AsH <sub>3</sub>                | 99                                  | 92  | 1.51                                | 1.52 | 119                                 | 125  |
| CH <sub>3</sub> Cl              | 107                                 | 108 | 1.09                                | 1.09 | 124                                 | 125  |
| COCl <sub>2</sub>               | 123                                 | 123 | 1.18                                | 1.17 | 124                                 | 125  |
| C <sub>2</sub> H <sub>2</sub>   | 179                                 | 179 | 1.19                                | 1.19 | 125                                 | 125  |
| C <sub>2</sub> H <sub>4</sub>   | 116                                 | 116 | 1.33                                | 1.32 | 124                                 | 125  |
| H <sub>2</sub> Se               | 91                                  | 91  | 1.47                                | 1.47 | 121                                 | 125  |

|                                   |     |     |      |      |     |     |
|-----------------------------------|-----|-----|------|------|-----|-----|
| H <sub>2</sub> S                  | 93  | 92  | 1.34 | 1.34 | 120 | 125 |
| PH <sub>3</sub>                   | 101 | 93  | 1.40 | 1.41 | 118 | 125 |
| COF <sub>2</sub>                  | 125 | 126 | 1.17 | 1.17 | 124 | 125 |
| CH <sub>3</sub> F                 | 107 | 109 | 1.09 | 1.09 | 123 | 125 |
| HCHO                              | 119 | 121 | 1.22 | 1.20 | 118 | 125 |
| (CH <sub>3</sub> ) <sub>2</sub> O | 112 | 111 | 1.44 | 1.40 | 117 | 125 |
| CH <sub>3</sub> NH <sub>2</sub>   | 107 | 115 | 1.48 | 1.46 | 116 | 125 |

Table S2. Change in structural parameters due to gas adsorption on Al<sub>12</sub>N<sub>12</sub>.

| gas                               | bond angle of gas                    |     | bond length of gas                   |      | bond angle of cage                   |      |
|-----------------------------------|--------------------------------------|-----|--------------------------------------|------|--------------------------------------|------|
|                                   | gas/Al <sub>12</sub> N <sub>12</sub> | gas | gas/Al <sub>12</sub> N <sub>12</sub> | gas  | gas/Al <sub>12</sub> N <sub>12</sub> | cage |
| SiH <sub>4</sub>                  | 108                                  | 109 | 1.51                                 | 1.48 | 123                                  | 125  |
| H <sub>2</sub>                    | -                                    | -   | 0.75                                 | 0.74 | 124                                  | 125  |
| Cl <sub>2</sub>                   | -                                    | -   | 2.12                                 | 2.02 | 122                                  | 125  |
| F <sub>2</sub>                    | -                                    | -   | 1.38                                 | 1.37 | 125                                  | 125  |
| CF <sub>4</sub>                   | 108                                  | 109 | 1.30                                 | 1.32 | 124                                  | 125  |
| CH <sub>4</sub>                   | 111                                  | 109 | 1.09                                 | 1.09 | 124                                  | 125  |
| CF <sub>2</sub> Cl <sub>2</sub>   | 110                                  | 109 | 1.74                                 | 1.76 | 124                                  | 125  |
| N <sub>2</sub>                    | -                                    | -   | 1.09                                 | 1.09 | 123                                  | 125  |
| CHF <sub>3</sub>                  | 112                                  | 110 | 1.41                                 | 1.33 | 123                                  | 125  |
| OCS                               | 178                                  | 180 | 1.16                                 | 1.15 | 122                                  | 125  |
| N <sub>2</sub> O                  | 178                                  | 180 | 1.20                                 | 1.18 | 122                                  | 125  |
| AsH <sub>3</sub>                  | 98                                   | 92  | 1.51                                 | 1.52 | 121                                  | 125  |
| CH <sub>3</sub> Cl                | 106                                  | 108 | 1.09                                 | 1.09 | 122                                  | 125  |
| COCl <sub>2</sub>                 | 123                                  | 123 | 1.19                                 | 1.17 | 122                                  | 125  |
| C <sub>2</sub> H <sub>2</sub>     | 178                                  | 179 | 1.20                                 | 1.19 | 122                                  | 125  |
| C <sub>2</sub> H <sub>4</sub>     | 117                                  | 116 | 1.34                                 | 1.32 | 121                                  | 125  |
| H <sub>2</sub> Se                 | 91                                   | 91  | 1.47                                 | 1.47 | 122                                  | 125  |
| H <sub>2</sub> S                  | 93                                   | 92  | 1.34                                 | 1.34 | 122                                  | 125  |
| PH <sub>3</sub>                   | 99                                   | 93  | 1.41                                 | 1.41 | 121                                  | 125  |
| COF <sub>2</sub>                  | 125                                  | 126 | 1.19                                 | 1.17 | 122                                  | 125  |
| CH <sub>3</sub> F                 | 105                                  | 109 | 1.09                                 | 1.09 | 121                                  | 125  |
| HCHO                              | 119                                  | 121 | 1.22                                 | 1.20 | 120                                  | 125  |
| (CH <sub>3</sub> ) <sub>2</sub> O | 114                                  | 111 | 1.43                                 | 1.40 | 122                                  | 125  |
| CH <sub>3</sub> NH <sub>2</sub>   | 107                                  | 115 | 1.48                                 | 1.46 | 120                                  | 125  |

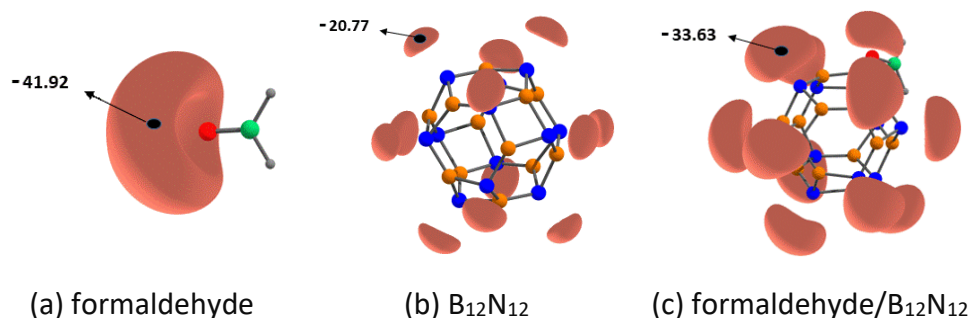

Figure S1. MESP plots of (a) formaldehyde (where position of  $V_{\min-x}$  is noted), (b)  $B_{12}N_{12}$  cage (where position of  $V_{\min-c}$  is noted), and (c) formaldehyde-adsorbed  $B_{12}N_{12}$  (where position of  $V_{\min-c}$  is noted) with  $-0.0235$  a.u. isosurface. Color code: orange-B, blue-N, green-C, red-O and gray-H.

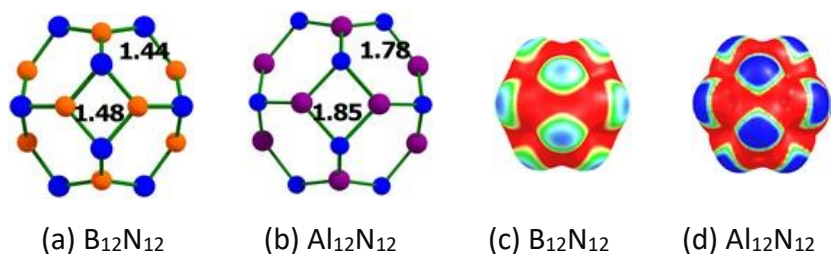

Figure S2. Optimized structures of (a)  $B_{12}N_{12}$  and (b)  $Al_{12}N_{12}$ .<sup>S1</sup> The bond distances are given in Å. Color code: purple-Al, orange-B, and blue-N. Also shown are the MESP mapped onto the  $0.01$  a.u. electron density isosurface of (c)  $B_{12}N_{12}$  and (d)  $Al_{12}N_{12}$ .<sup>S1</sup> Color code: blue  $-0.04$  a.u. to red  $0.04$  a.u. Blue represents the most electron-rich region and red the most electron-poor region.

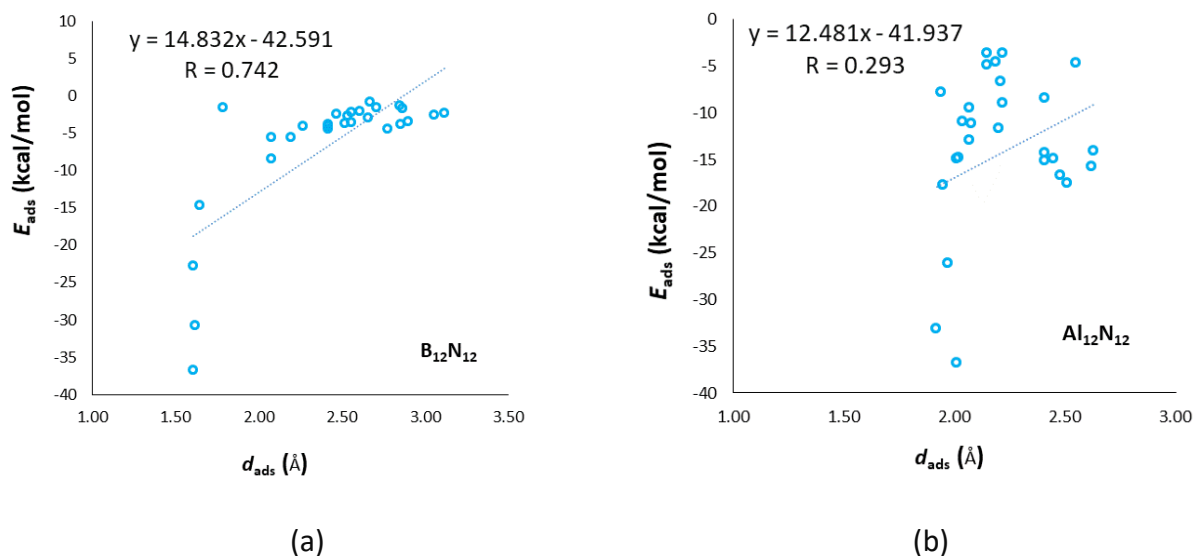

Figure S3. Correlation between  $d_{\text{ads}}$  and  $E_{\text{ads}}$  for gas-adsorbed (a)  $B_{12}N_{12}$  and (b)  $Al_{12}N_{12}$  nanocages.

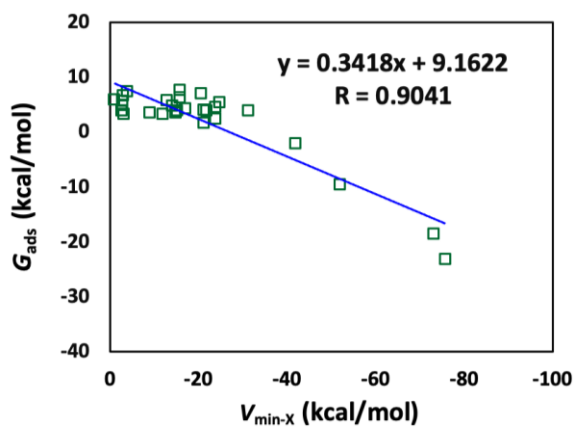

(a)

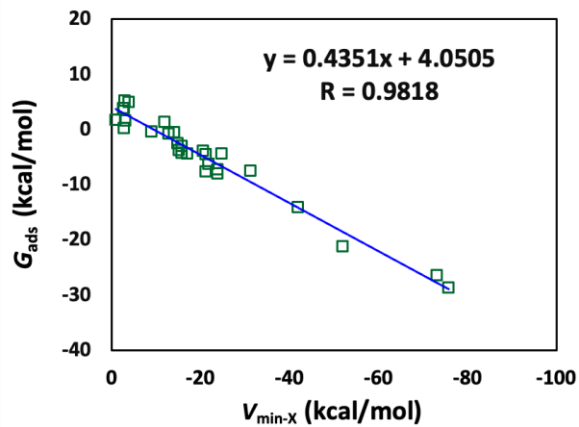

(b)

Figure S4. Correlation between  $V_{\min-X}$  and  $G_{\text{ads}}$  for gas-adsorbed (a)  $B_{12}N_{12}$  and (b)  $Al_{12}N_{12}$  nanocages.

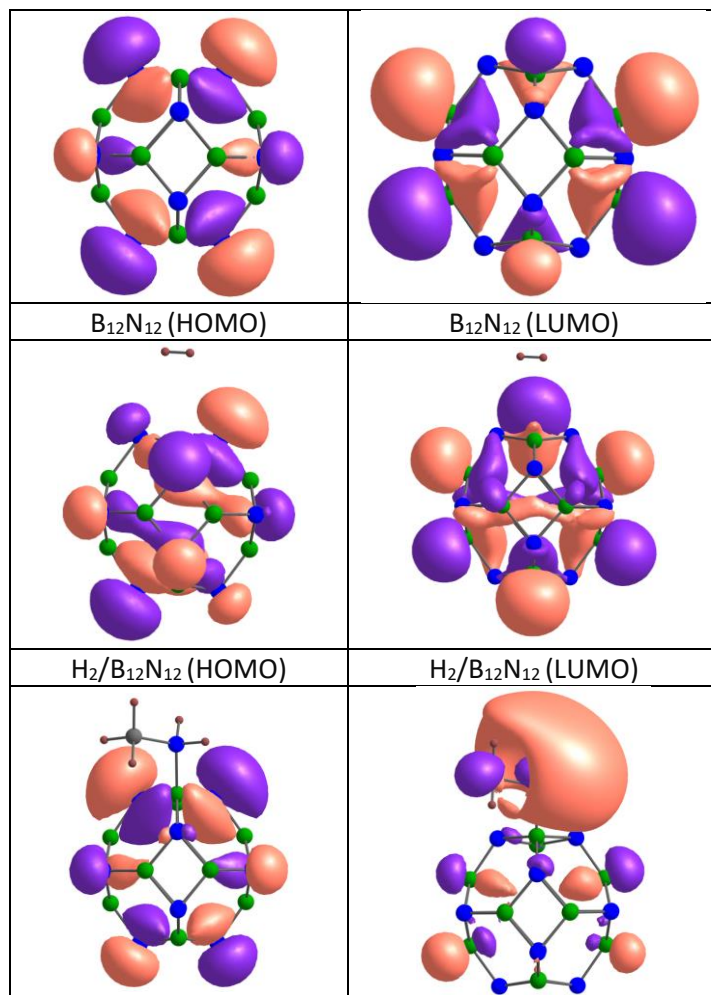

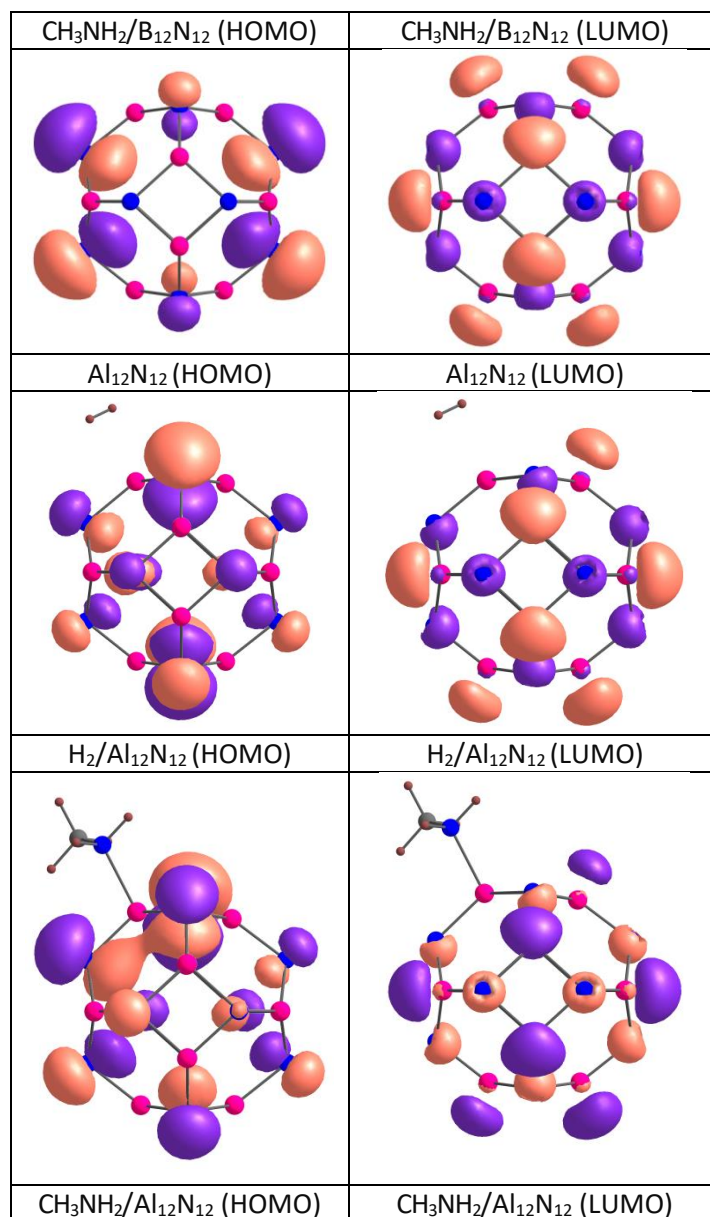

Figure S5. Molecular orbital diagrams for the pristine nanocages and some representative gas-adsorbed systems

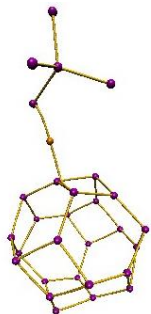

(a)  $\text{SiH}_4/\text{B}_{12}\text{N}_{12}$

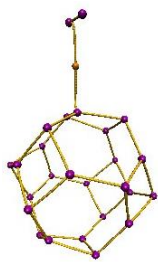

(b)  $\text{H}_2/\text{B}_{12}\text{N}_{12}$

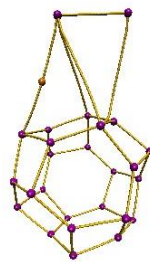

(c)  $\text{Cl}_2/\text{B}_{12}\text{N}_{12}$

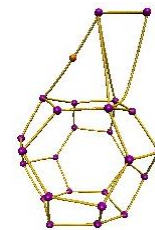

(d)  $\text{F}_2/\text{B}_{12}\text{N}_{12}$

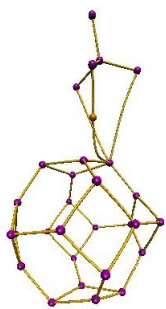

(e)  $\text{CF}_4/\text{B}_{12}\text{N}_{12}$

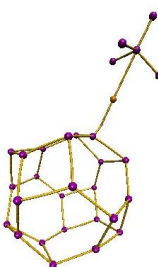

(f)  $\text{CH}_4/\text{B}_{12}\text{N}_{12}$

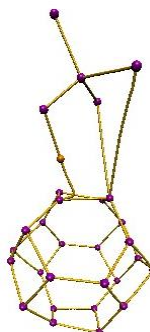

(g)  $\text{CF}_2\text{Cl}_2/\text{B}_{12}\text{N}_{12}$

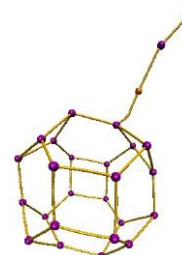

(h)  $\text{N}_2/\text{B}_{12}\text{N}_{12}$

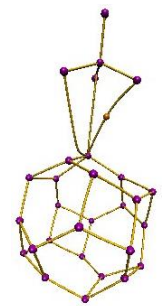

(i)  $\text{CHF}_3/\text{B}_{12}\text{N}_{12}$

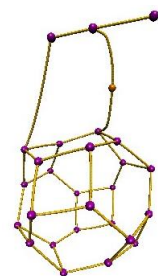

(j)  $\text{OCS}/\text{B}_{12}\text{N}_{12}$

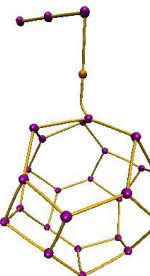

(k)  $\text{N}_2\text{O}/\text{B}_{12}\text{N}_{12}$

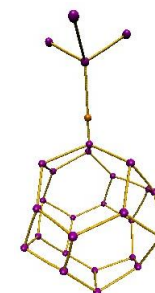

(l)  $\text{AsH}_3/\text{B}_{12}\text{N}_{12}$

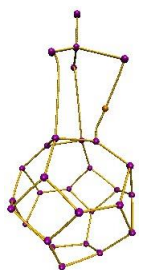

(m)  $\text{CH}_3\text{Cl}/\text{B}_{12}\text{N}_{12}$

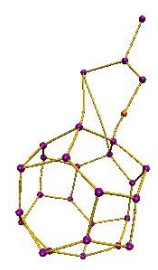

(n)  $\text{COCl}_2/\text{B}_{12}\text{N}_{12}$

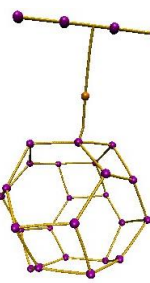

(o)  $\text{C}_2\text{H}_2/\text{B}_{12}\text{N}_{12}$

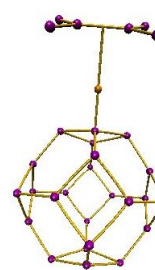

(p)  $\text{C}_2\text{H}_4/\text{B}_{12}\text{N}_{12}$

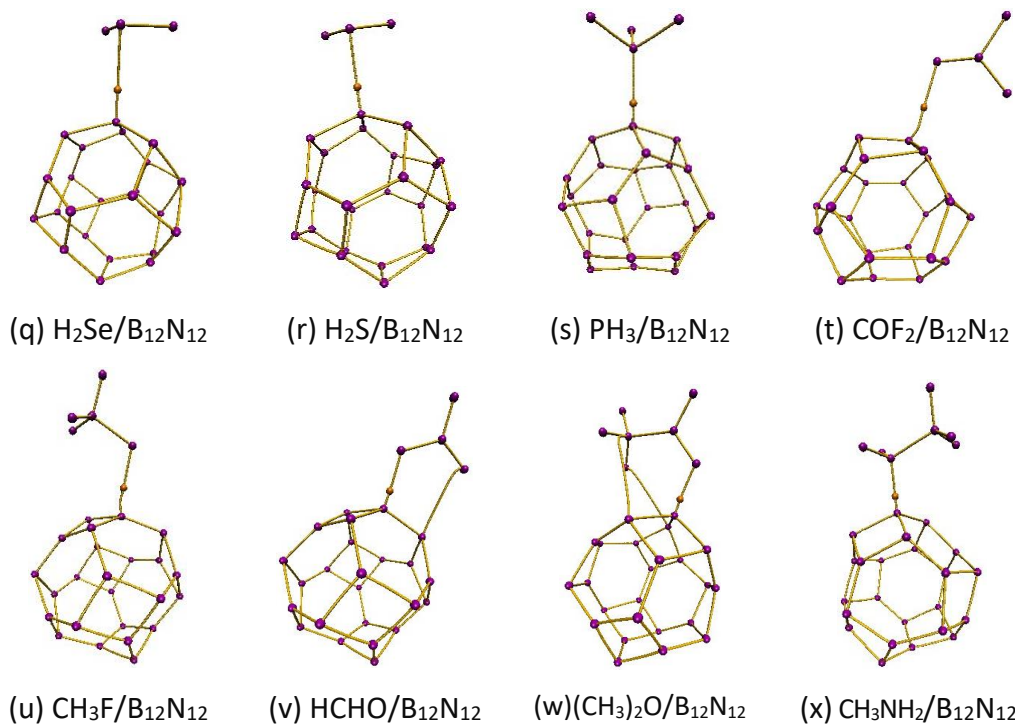

Figure S6. QTAIM plots for (a)  $\text{SiH}_4$ , (b)  $\text{H}_2$ , (c)  $\text{Cl}_2$ , (d)  $\text{F}_2$ , (e)  $\text{CF}_4$ , (f)  $\text{CH}_4$ , (g)  $\text{CF}_2\text{Cl}_2$ , (h)  $\text{N}_2$ , (i)  $\text{CHF}_3$ , (j)  $\text{OCS}$ , (k)  $\text{N}_2\text{O}$ , (l)  $\text{AsH}_3$ , (m)  $\text{CH}_3\text{Cl}$ , (n)  $\text{COCl}_2$ , (o)  $\text{C}_2\text{H}_2$ , (p)  $\text{C}_2\text{H}_4$ , (q)  $\text{H}_2\text{Se}$ , (r)  $\text{H}_2\text{S}$ , (s)  $\text{PH}_3$ , (t)  $\text{COF}_2$ , (u)  $\text{CH}_3\text{F}$ , (v)  $\text{HCHO}$ , (w)  $(\text{CH}_3)_2\text{O}$ , and (x)  $\text{CH}_3\text{NH}_2$  adsorbed on  $\text{B}_{12}\text{N}_{12}$ .

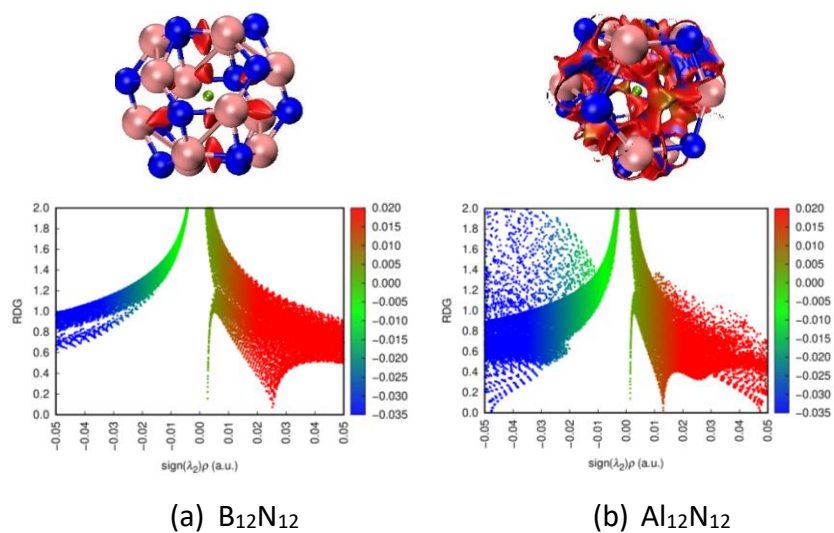



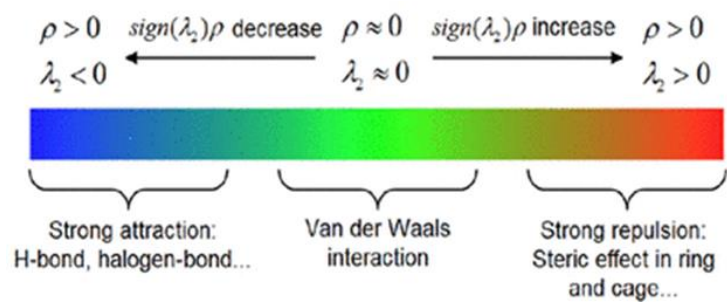

Figure S7. The NCI iso-surface plots with the complementary 2D NCI diagrams for (a)  $B_{12}N_{12}$  and (b)  $Al_{12}N_{12}$ .

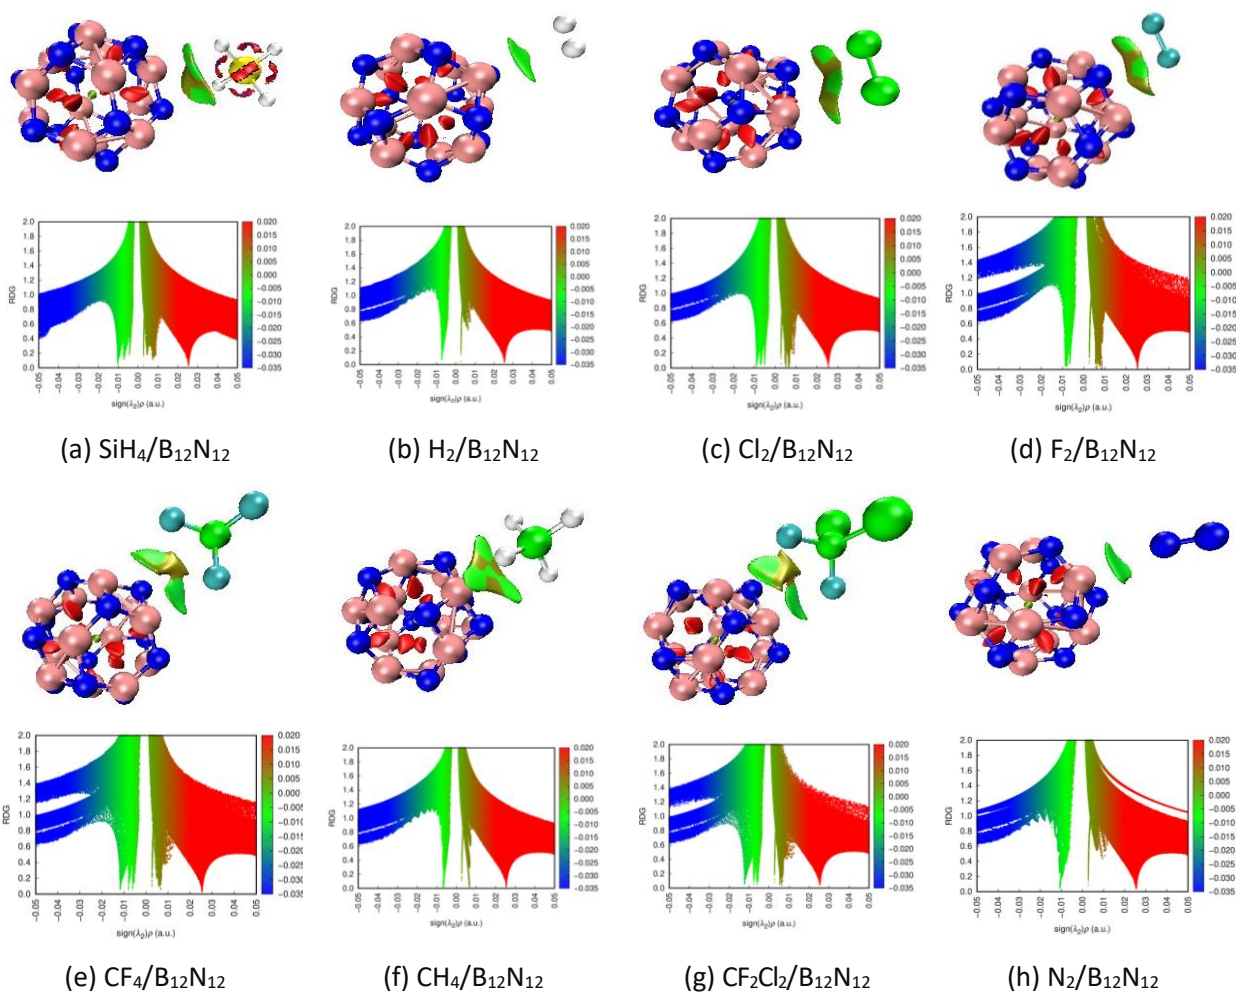



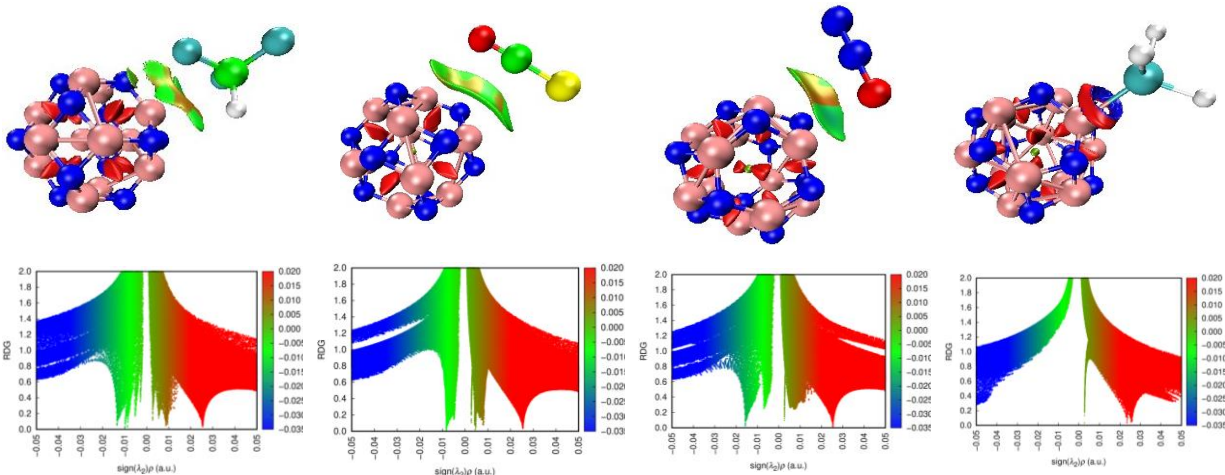

(i)  $\text{CHF}_3/\text{B}_{12}\text{N}_{12}$

(j)  $\text{OCS}/\text{B}_{12}\text{N}_{12}$

(k)  $\text{N}_2\text{O}/\text{B}_{12}\text{N}_{12}$

(l)  $\text{AsH}_3/\text{B}_{12}\text{N}_{12}$

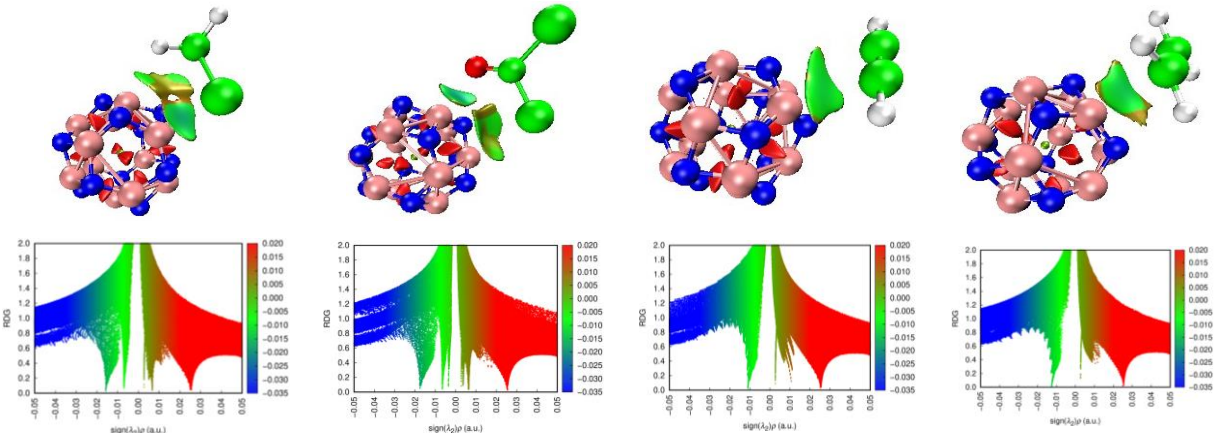

(m)  $\text{CH}_3\text{Cl}/\text{B}_{12}\text{N}_{12}$

(n)  $\text{COCl}_2/\text{B}_{12}\text{N}_{12}$

(o)  $\text{C}_2\text{H}_2/\text{B}_{12}\text{N}_{12}$

(p)  $\text{C}_2\text{H}_4/\text{B}_{12}\text{N}_{12}$

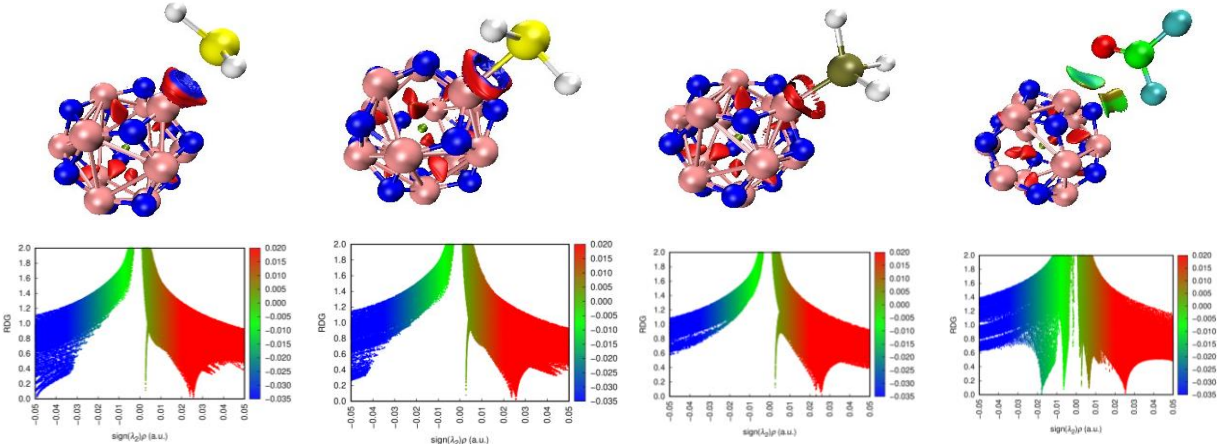

(q)  $\text{H}_2\text{Se}/\text{B}_{12}\text{N}_{12}$

(r)  $\text{H}_2\text{S}/\text{B}_{12}\text{N}_{12}$

(s)  $\text{PH}_3/\text{B}_{12}\text{N}_{12}$

(t)  $\text{COF}_2/\text{B}_{12}\text{N}_{12}$

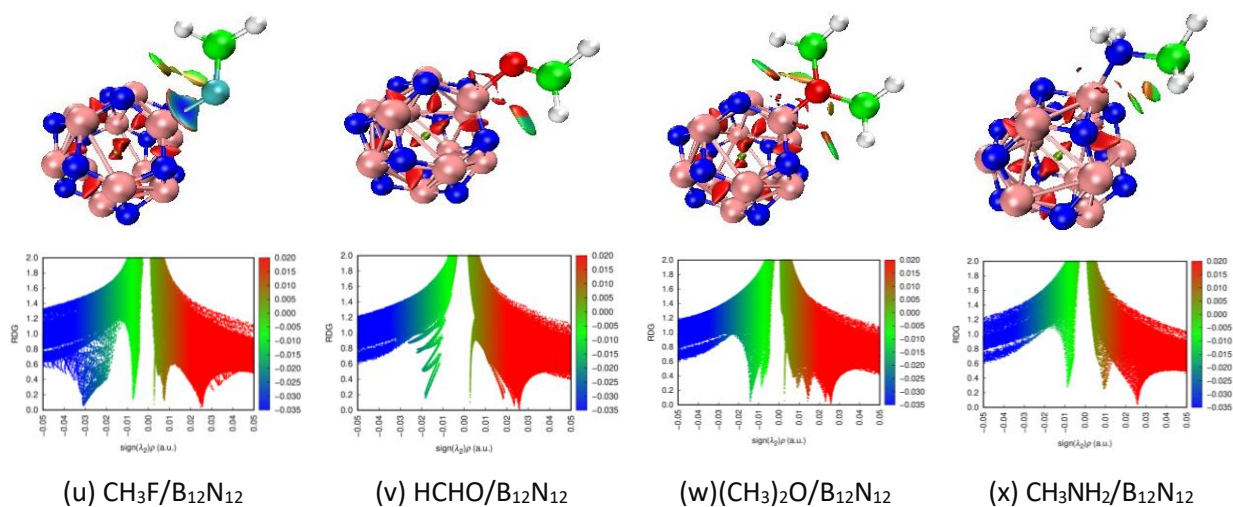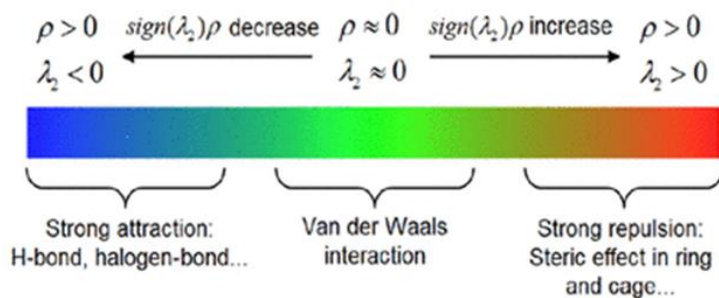

Figure S8. The NCI isosurface plots with the complementary 2D NCI diagrams for the gases adsorbed on B<sub>12</sub>N<sub>12</sub>.

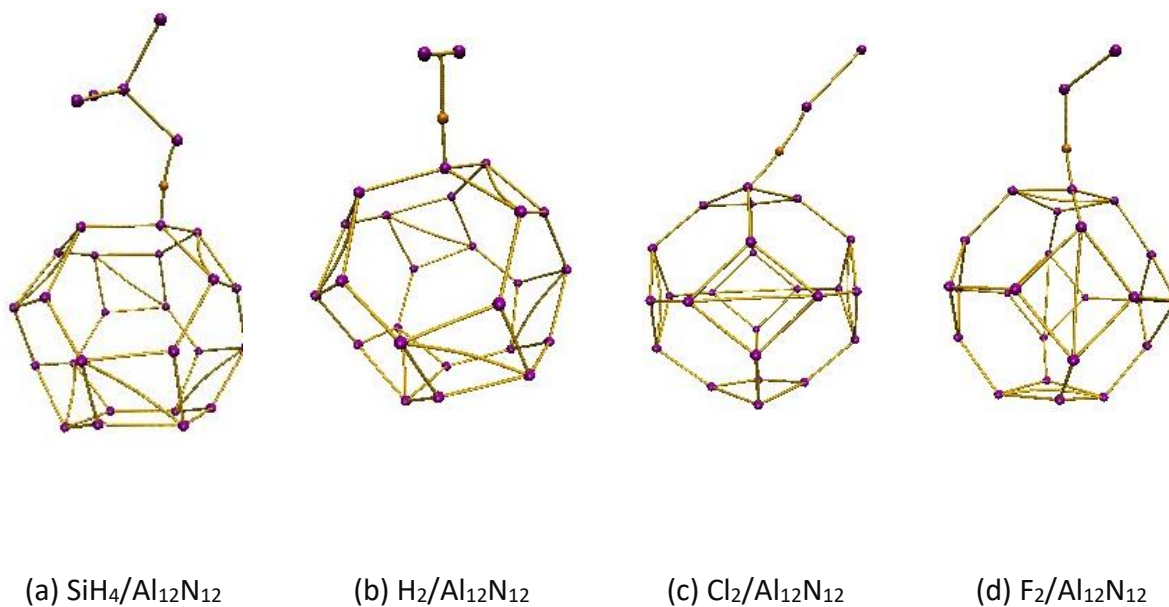

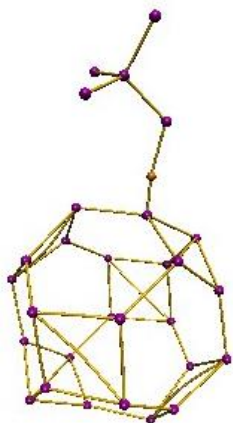

(e)  $\text{CF}_4/\text{Al}_{12}\text{N}_{12}$

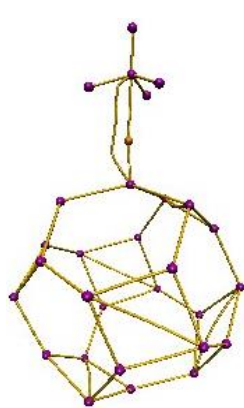

(f)  $\text{CH}_4/\text{Al}_{12}\text{N}_{12}$

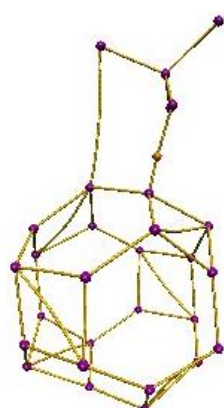

(g)  $\text{CF}_2\text{Cl}_2/\text{Al}_{12}\text{N}_{12}$

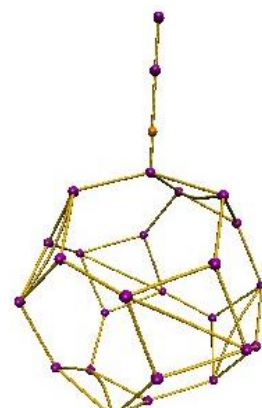

(h)  $\text{N}_2/\text{Al}_{12}\text{N}_{12}$

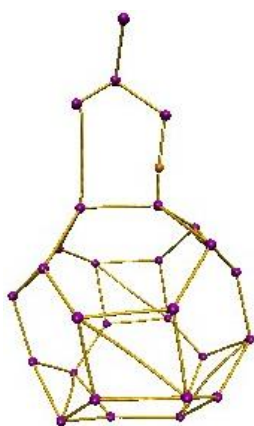

(i)  $\text{CHF}_3/\text{Al}_{12}\text{N}_{12}$

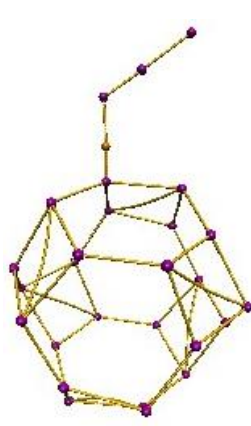

(j)  $\text{OCS}/\text{Al}_{12}\text{N}_{12}$

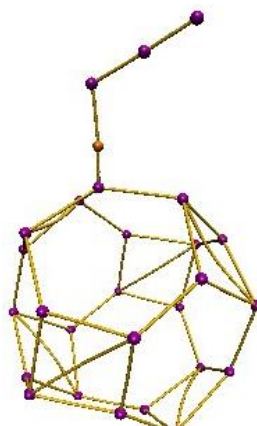

(k)  $\text{N}_2\text{O}/\text{Al}_{12}\text{N}_{12}$

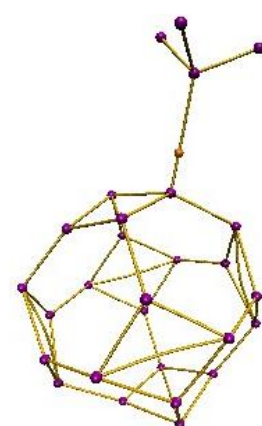

(l)  $\text{AsH}_3/\text{Al}_{12}\text{N}_{12}$

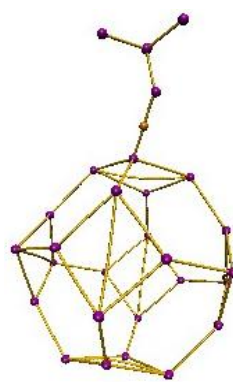

(m)  $\text{CH}_3\text{Cl}/\text{Al}_{12}\text{N}_{12}$

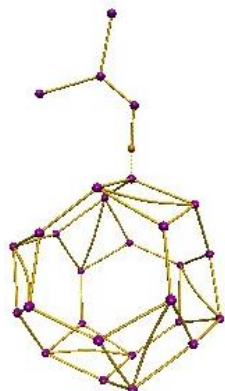

(n)  $\text{COCl}_2/\text{Al}_{12}\text{N}_{12}$

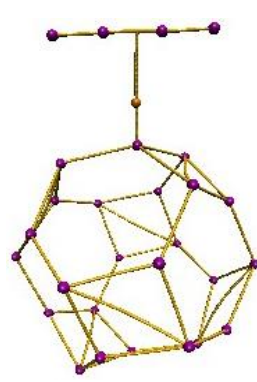

(o)  $\text{C}_2\text{H}_2/\text{Al}_{12}\text{N}_{12}$

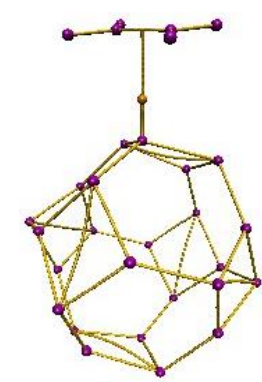

(p)  $\text{C}_2\text{H}_4/\text{Al}_{12}\text{N}_{12}$



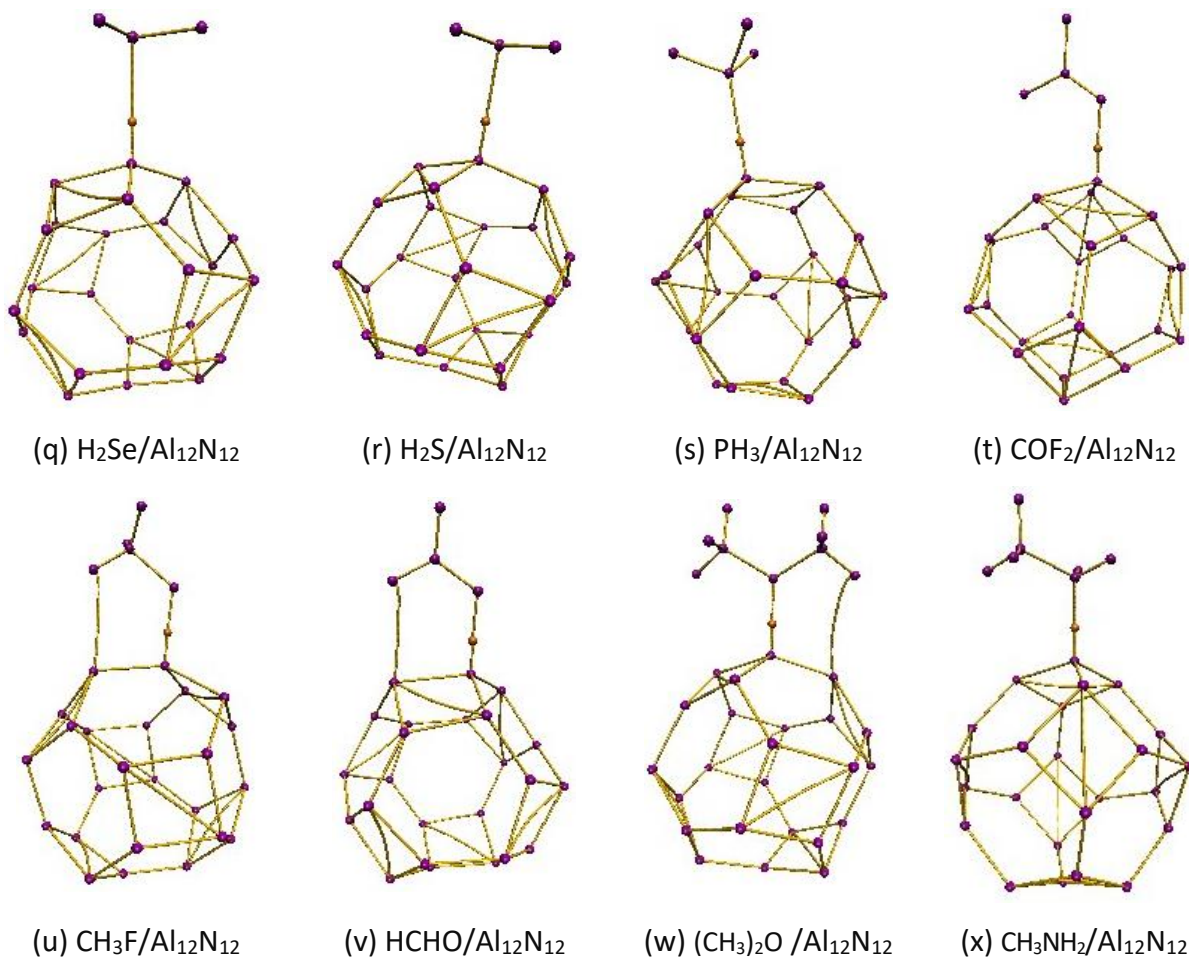

Figure S9. QAIM plots for (a)  $\text{SiH}_4$ , (b)  $\text{H}_2$ , (c)  $\text{Cl}_2$ , (d)  $\text{F}_2$ , (e)  $\text{CF}_4$ , (f)  $\text{CH}_4$ , (g)  $\text{CF}_2\text{Cl}_2$ , (h)  $\text{N}_2$ , (i)  $\text{CHF}_3$ , (j)  $\text{OCS}$ , (k)  $\text{N}_2\text{O}$ , (l)  $\text{AsH}_3$ , (m)  $\text{CH}_3\text{Cl}$ , (n)  $\text{COCl}_2$ , (o)  $\text{C}_2\text{H}_2$ , (p)  $\text{C}_2\text{H}_4$ , (q)  $\text{H}_2\text{Se}$ , (r)  $\text{H}_2\text{S}$ , (s)  $\text{PH}_3$ , (t)  $\text{COF}_2$ , (u)  $\text{CH}_3\text{F}$ , (v)  $\text{HCHO}$ , (w)  $(\text{CH}_3)_2\text{O}$ , and (x)  $\text{CH}_3\text{NH}_2$  adsorbed on  $\text{Al}_{12}\text{N}_{12}$ .

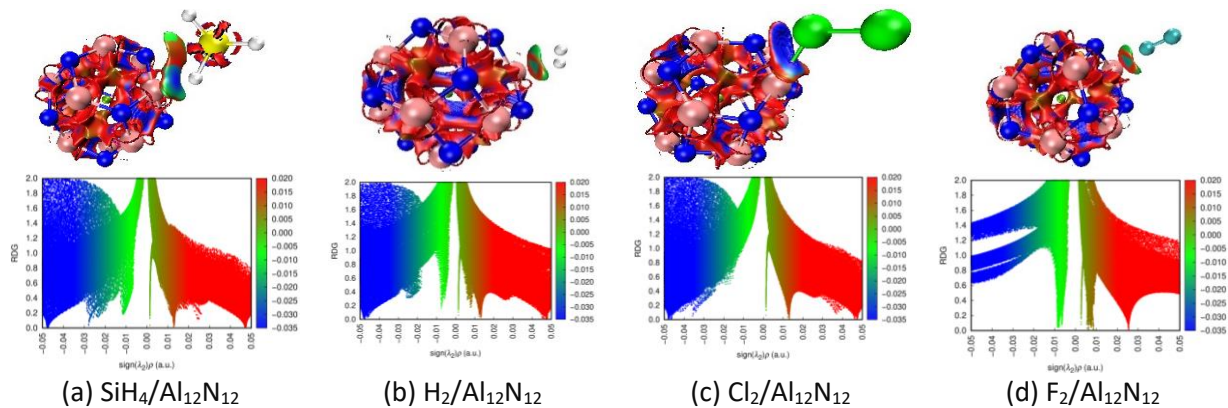

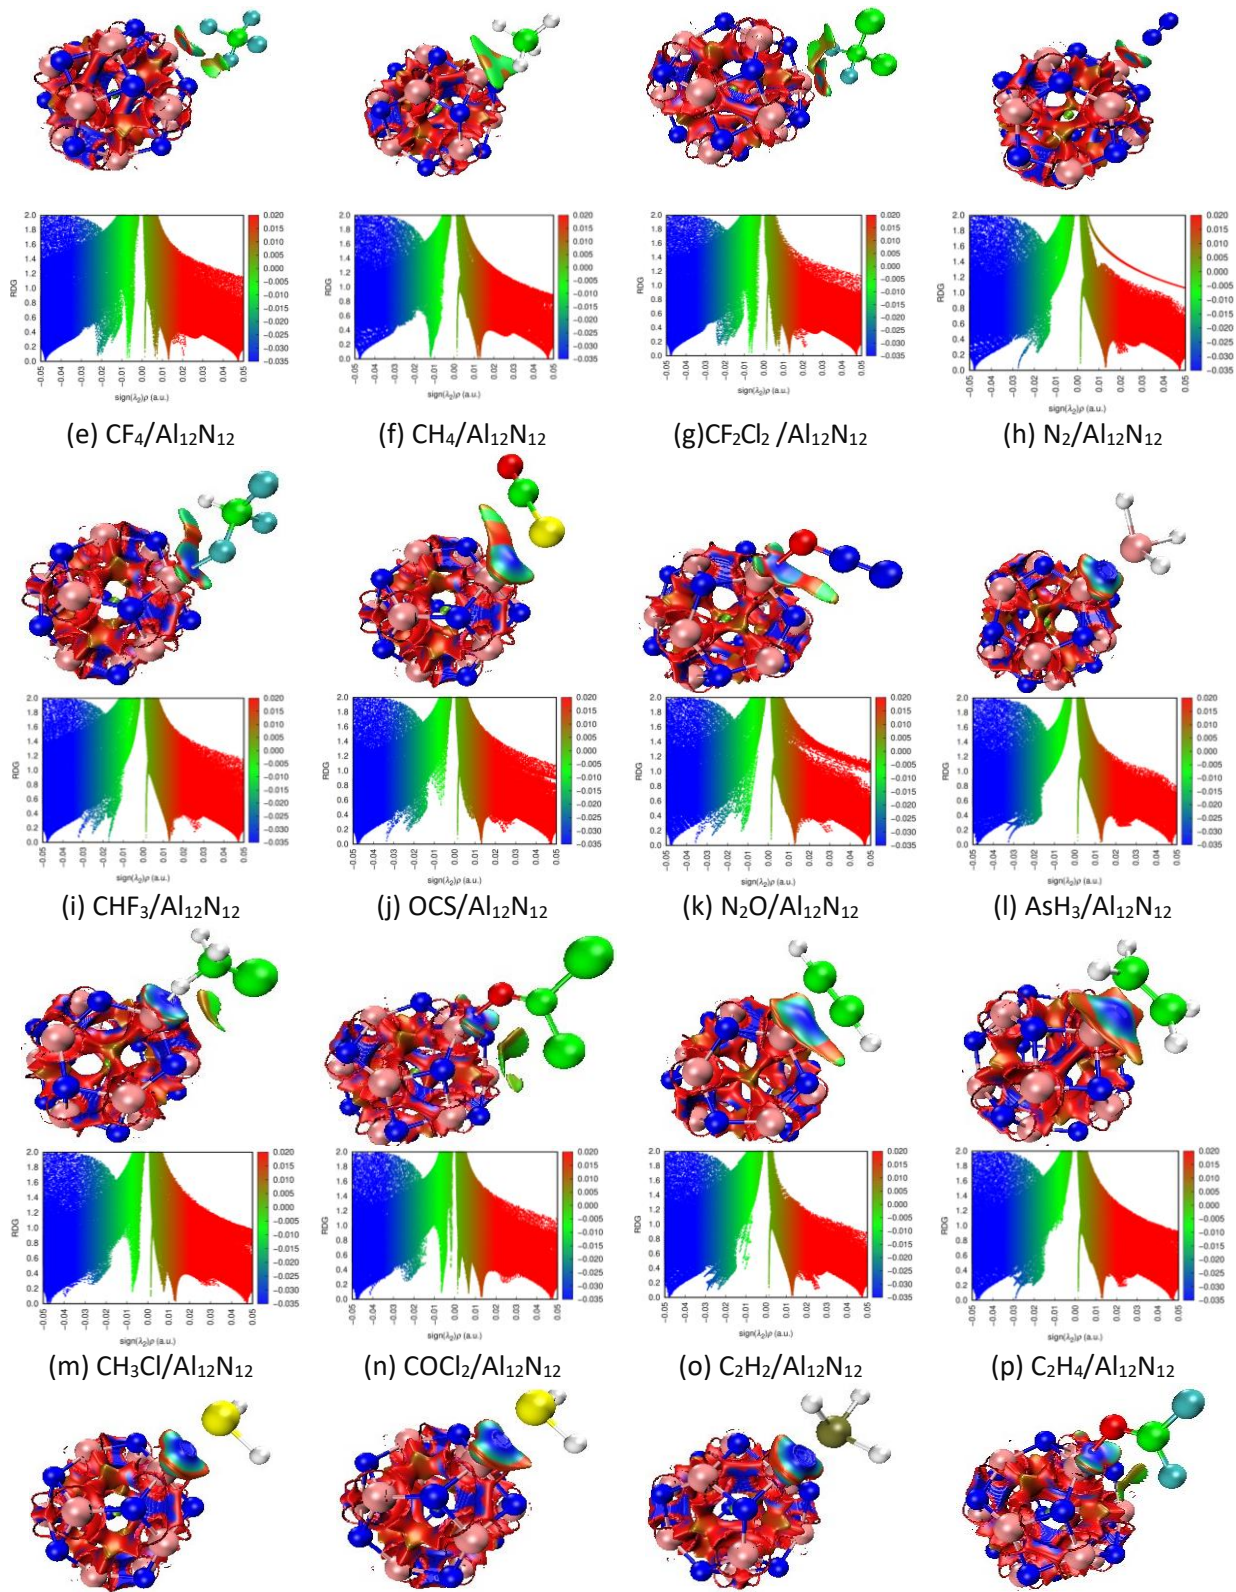



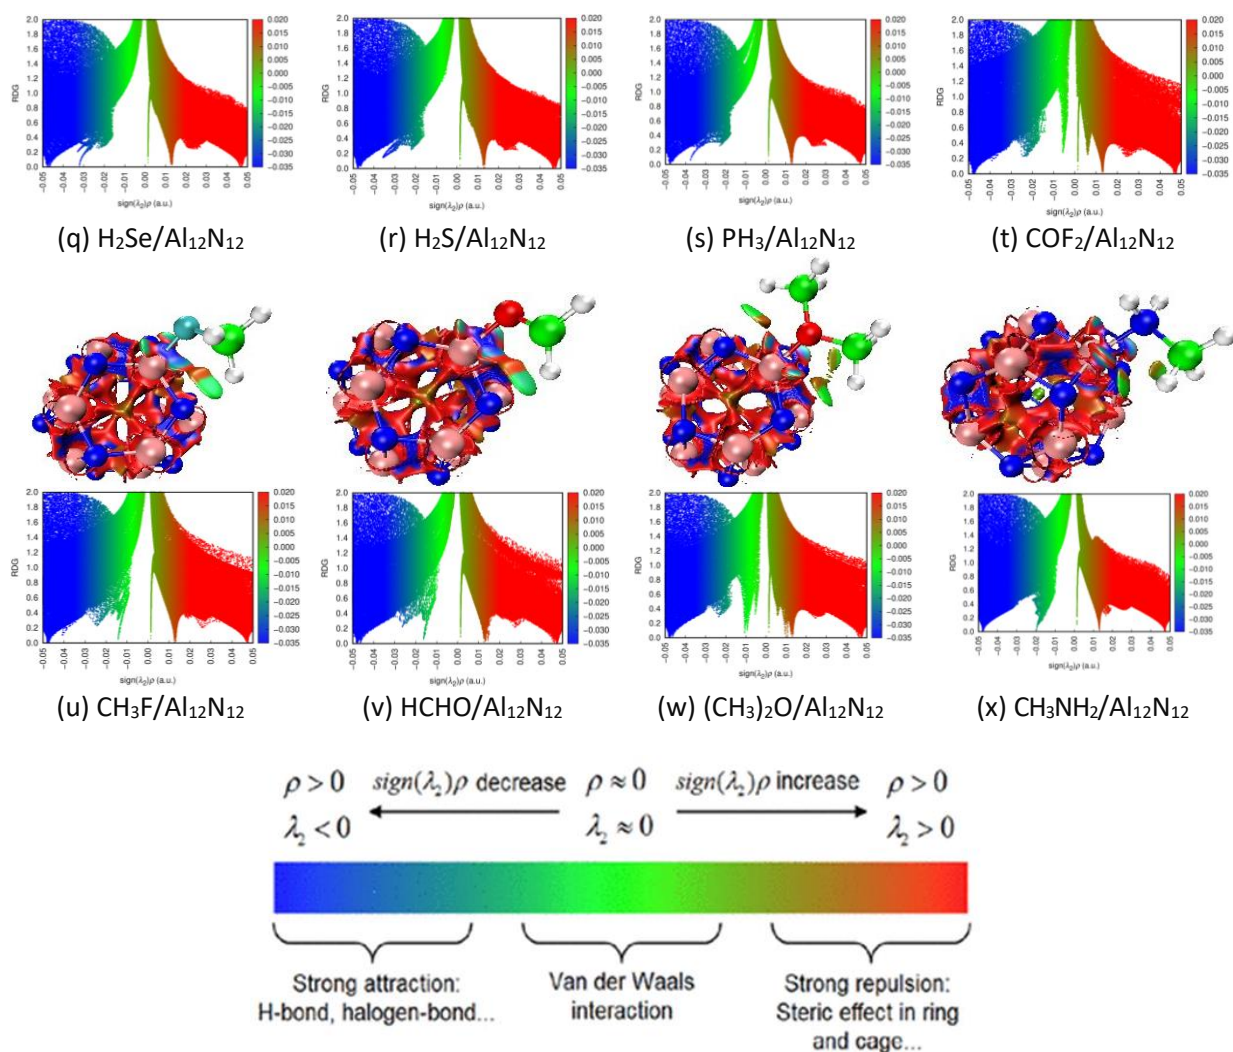

Figure S10. The NCI isosurface plots with the complementary 2D NCI diagrams for the gases adsorbed on  $\text{Al}_{12}\text{N}_{12}$ .

Table S3. Cartesian coordinates for the gas-adsorbed  $\text{B}_{12}\text{N}_{12}$  nanocages

| $\text{SiH}_4/\text{B}_{12}\text{N}_{12}$ |              |              |              | $\text{H}_2/\text{B}_{12}\text{N}_{12}$ |              |              |              |
|-------------------------------------------|--------------|--------------|--------------|-----------------------------------------|--------------|--------------|--------------|
| 5                                         | 1.498434000  | -0.589584000 | 0.179243000  | 5                                       | 1.367578000  | 0.638163000  | -1.512161000 |
| 5                                         | 1.114597000  | 1.261982000  | 0.463102000  | 5                                       | 2.115720000  | -0.092781000 | 0.084878000  |
| 7                                         | 1.308978000  | 0.167381000  | 1.441807000  | 7                                       | 1.861793000  | -0.730475000 | -1.230028000 |
| 7                                         | 1.610648000  | 0.565342000  | -0.749957000 | 7                                       | 1.913385000  | 1.321843000  | -0.315219000 |
| 7                                         | 0.908070000  | -1.863346000 | -0.133184000 | 7                                       | 0.141990000  | 0.969861000  | -2.186711000 |
| 7                                         | -1.275330000 | -2.249634000 | -0.500315000 | 7                                       | -1.927592000 | 0.656792000  | -1.367960000 |
| 5                                         | -0.341485000 | -2.068132000 | 0.637030000  | 5                                       | -0.851612000 | -0.119012000 | -2.030379000 |
| 5                                         | -0.088564000 | -1.731071000 | -1.221295000 | 5                                       | -0.807999000 | 1.621786000  | -1.253896000 |
| 5                                         | -2.318360000 | -1.261674000 | -0.463078000 | 5                                       | -2.243306000 | 0.091937000  | -0.084469000 |
| 5                                         | -2.694520000 | 0.585731000  | -0.178580000 | 5                                       | -1.500542000 | -0.638417000 | 1.512972000  |
| 7                                         | -2.812585000 | -0.564818000 | 0.748588000  | 7                                       | -2.046205000 | -1.321775000 | 0.315477000  |
| 7                                         | -2.514313000 | -0.166673000 | -1.443332000 | 7                                       | -1.995066000 | 0.730435000  | 1.230606000  |
| 7                                         | 0.071053000  | 2.250027000  | 0.500511000  | 7                                       | 1.794879000  | -0.657045000 | 1.368007000  |



|                                                  |              |              |              |                                                  |              |              |              |
|--------------------------------------------------|--------------|--------------|--------------|--------------------------------------------------|--------------|--------------|--------------|
| 7                                                | -2.112044000 | 1.862248000  | 0.133072000  | 7                                                | -0.274966000 | -0.969969000 | 2.186499000  |
| 5                                                | -1.115161000 | 1.731013000  | 1.222431000  | 5                                                | 0.675135000  | -1.621408000 | 1.253478000  |
| 5                                                | -0.862054000 | 2.068806000  | -0.636551000 | 5                                                | 0.719047000  | 0.118844000  | 2.029756000  |
| 5                                                | 0.063699000  | -0.183788000 | 2.067233000  | 5                                                | 0.766674000  | -1.656613000 | -1.145209000 |
| 7                                                | -0.661967000 | -1.465059000 | 1.901730000  | 7                                                | -0.552625000 | -1.506769000 | -1.805174000 |
| 5                                                | -1.788347000 | -0.511792000 | 1.755683000  | 5                                                | -0.989195000 | -1.922986000 | -0.451005000 |
| 7                                                | -1.105543000 | 0.712621000  | 2.236528000  | 7                                                | 0.322458000  | -2.368531000 | 0.077069000  |
| 5                                                | 0.583955000  | 0.511425000  | -1.755054000 | 5                                                | 0.856062000  | 1.922167000  | 0.450668000  |
| 7                                                | -0.098501000 | -0.712873000 | -2.236343000 | 7                                                | -0.455565000 | 2.368194000  | -0.077126000 |
| 5                                                | -1.267816000 | 0.183288000  | -2.068239000 | 5                                                | -0.899663000 | 1.657113000  | 1.145537000  |
| 7                                                | -0.541824000 | 1.464912000  | -1.901221000 | 7                                                | 0.419598000  | 1.506590000  | 1.805084000  |
| 14                                               | 4.813549000  | 0.003453000  | -0.001149000 | 1                                                | 4.807490000  | -0.363406000 | -0.015384000 |
| 1                                                | 4.277172000  | 1.197940000  | 0.686129000  | 1                                                | 4.738426000  | 0.375370000  | 0.010869000  |
| 1                                                | 3.906908000  | -1.148630000 | 0.232666000  |                                                  |              |              |              |
| 1                                                | 6.142100000  | -0.329709000 | 0.555758000  |                                                  |              |              |              |
| 1                                                | 4.925731000  | 0.250147000  | -1.453285000 |                                                  |              |              |              |
| Cl <sub>2</sub> /B <sub>12</sub> N <sub>12</sub> |              |              |              | F <sub>2</sub> /B <sub>12</sub> N <sub>12</sub>  |              |              |              |
| 5                                                | -0.006094000 | -1.235938000 | 1.531259000  | 5                                                | 0.323340000  | 1.278569000  | -1.559210000 |
| 5                                                | 1.039460000  | -0.906575000 | -0.030761000 | 5                                                | 1.401252000  | 1.060665000  | -0.000075000 |
| 7                                                | 1.057976000  | -0.233736000 | 1.291505000  | 7                                                | 1.468080000  | 0.372012000  | -1.311451000 |
| 7                                                | 0.212003000  | -2.082067000 | 0.333022000  | 7                                                | 0.478999000  | 2.159827000  | -0.376896000 |
| 7                                                | -1.269685000 | -0.985395000 | 2.169490000  | 7                                                | -0.919445000 | 0.914611000  | -2.183200000 |
| 7                                                | -2.950159000 | 0.234118000  | 1.309075000  | 7                                                | -2.488528000 | -0.423354000 | -1.289447000 |
| 5                                                | -1.661187000 | 0.436024000  | 2.013000000  | 5                                                | -1.191811000 | -0.531268000 | -2.000050000 |
| 5                                                | -2.381962000 | -1.131152000 | 1.200886000  | 5                                                | -2.033699000 | 0.985468000  | -1.208403000 |
| 5                                                | -2.937776000 | 0.891279000  | 0.030893000  | 5                                                | -2.414167000 | -1.055001000 | -0.000413000 |
| 5                                                | -1.897287000 | 1.223932000  | -1.532008000 | 5                                                | -1.339809000 | -1.273207000 | 1.559869000  |
| 7                                                | -2.113512000 | 2.068675000  | -0.332990000 | 7                                                | -1.493581000 | -2.154025000 | 0.377293000  |
| 7                                                | -2.963084000 | 0.221530000  | -1.291161000 | 7                                                | -2.485946000 | -0.366139000 | 1.310272000  |
| 7                                                | 1.045238000  | -0.246411000 | -1.308890000 | 7                                                | 1.470595000  | 0.429386000  | 1.290020000  |
| 7                                                | -0.633856000 | 0.973784000  | -2.169632000 | 7                                                | -0.097343000 | -0.909331000 | 2.183369000  |
| 5                                                | 0.479278000  | 1.118684000  | -1.200649000 | 5                                                | 1.018293000  | -0.979334000 | 1.208480000  |
| 5                                                | -0.242434000 | -0.447816000 | -2.012789000 | 5                                                | 0.174948000  | 0.536675000  | 1.999803000  |
| 5                                                | 0.503033000  | 1.088229000  | 1.200536000  | 5                                                | 1.023815000  | -0.989306000 | -1.193454000 |
| 7                                                | -0.762629000 | 1.542404000  | 1.825012000  | 7                                                | -0.204410000 | -1.556686000 | -1.800226000 |
| 5                                                | -0.923074000 | 2.122658000  | 0.470723000  | 5                                                | -0.307891000 | -2.124022000 | -0.434583000 |
| 7                                                | 0.465151000  | 1.935110000  | -0.016674000 | 7                                                | 1.062844000  | -1.814155000 | 0.038376000  |
| 5                                                | -0.978537000 | -2.134377000 | -0.470990000 | 5                                                | -0.706742000 | 2.129580000  | 0.434988000  |
| 7                                                | -2.366173000 | -1.945720000 | 0.016845000  | 7                                                | -2.077422000 | 1.819458000  | -0.038601000 |
| 5                                                | -2.405500000 | -1.100402000 | -1.200353000 | 5                                                | -2.039291000 | 0.995191000  | 1.193011000  |
| 7                                                | -1.140469000 | -1.554433000 | -1.825595000 | 7                                                | -0.812096000 | 1.562383000  | 1.800752000  |
| 17                                               | 3.901462000  | 1.027654000  | 0.001288000  | 9                                                | 3.908975000  | -0.690335000 | -0.000678000 |
| 17                                               | 4.157056000  | -0.975756000 | -0.001216000 | 9                                                | 4.218423000  | 0.645006000  | 0.000495000  |
| CF <sub>4</sub> /B <sub>12</sub> N <sub>12</sub> |              |              |              | CH <sub>4</sub> /B <sub>12</sub> N <sub>12</sub> |              |              |              |
| 5                                                | 0.854940000  | -0.648655000 | 0.286451000  | 5                                                | 1.848599000  | 0.061150000  | -0.024319000 |
| 5                                                | 0.551662000  | 1.236719000  | 0.340218000  | 5                                                | 1.057833000  | -1.581194000 | 0.544662000  |
| 7                                                | 0.686171000  | 0.259465000  | 1.446206000  | 7                                                | 1.595087000  | -1.190408000 | -0.780323000 |
| 7                                                | 1.029891000  | 0.379319000  | -0.771659000 | 7                                                | 1.598003000  | -0.455812000 | 1.344023000  |
| 7                                                | 0.218038000  | -1.926398000 | 0.117597000  | 7                                                | 1.556014000  | 1.392780000  | -0.484198000 |
| 7                                                | -1.975484000 | -2.264133000 | -0.240630000 | 7                                                | -0.493898000 | 2.265150000  | -0.782952000 |
| 5                                                | -1.049455000 | -1.986466000 | 0.883630000  | 5                                                | 0.463873000  | 1.377809000  | -1.485820000 |
| 5                                                | -0.757858000 | -1.884475000 | -0.996874000 | 5                                                | 0.466222000  | 2.000889000  | 0.315467000  |
| 5                                                | -2.975385000 | -1.236349000 | -0.339954000 | 5                                                | -1.735995000 | 1.582238000  | -0.544991000 |
| 5                                                | -3.274476000 | 0.646182000  | -0.284600000 | 5                                                | -2.518197000 | -0.061130000 | 0.024186000  |
| 7                                                | -3.454090000 | -0.379143000 | 0.770907000  | 7                                                | -2.275833000 | 0.455979000  | -1.343933000 |
| 7                                                | -3.110975000 | -0.259475000 | -1.447026000 | 7                                                | -2.273040000 | 1.190430000  | 0.780205000  |
| 7                                                | -0.448496000 | 2.264624000  | 0.240601000  | 7                                                | -0.184241000 | -2.265011000 | 0.782817000  |
| 7                                                | -2.641554000 | 1.925918000  | -0.117273000 | 7                                                | -2.234238000 | -1.392967000 | 0.484142000  |

|                                                                  |              |              |              |                                                 |              |              |              |
|------------------------------------------------------------------|--------------|--------------|--------------|-------------------------------------------------|--------------|--------------|--------------|
| 5                                                                | -1.665446000 | 1.884960000  | 0.997684000  | 5                                               | -1.144162000 | -2.001566000 | -0.315695000 |
| 5                                                                | -1.373828000 | 1.986620000  | -0.883755000 | 5                                               | -1.141829000 | -1.378230000 | 1.486298000  |
| 5                                                                | -0.581353000 | 0.039074000  | 2.085494000  | 5                                               | 0.528176000  | -1.010135000 | -1.725852000 |
| 7                                                                | -1.359722000 | -1.222377000 | 2.061143000  | 7                                               | 0.118989000  | 0.275093000  | -2.340949000 |
| 5                                                                | -2.441516000 | -0.247998000 | 1.782683000  | 5                                               | -1.211085000 | -0.270934000 | -1.979434000 |
| 7                                                                | -1.712716000 | 0.996318000  | 2.126338000  | 7                                               | -0.802494000 | -1.661815000 | -1.669828000 |
| 5                                                                | 0.017342000  | 0.247888000  | -1.782329000 | 5                                               | 0.533180000  | 0.270919000  | 1.978623000  |
| 7                                                                | -0.711446000 | -0.996198000 | -2.126274000 | 7                                               | 0.124528000  | 1.661914000  | 1.669916000  |
| 5                                                                | -1.842603000 | -0.039110000 | -2.086230000 | 5                                               | -1.206145000 | 1.010578000  | 1.726470000  |
| 7                                                                | -1.064365000 | 1.222464000  | -2.061178000 | 7                                               | -0.796952000 | -0.275120000 | 2.340752000  |
| 6                                                                | 4.156269000  | 0.005046000  | -0.005049000 | 6                                               | 4.876241000  | -0.000424000 | 0.000528000  |
| 9                                                                | 3.656176000  | 1.095307000  | 0.539017000  | 1                                               | 4.518780000  | -0.779092000 | -0.673614000 |
| 9                                                                | 5.396712000  | -0.158410000 | 0.402582000  | 1                                               | 4.511121000  | 0.971587000  | -0.332918000 |
| 9                                                                | 3.437575000  | -1.042652000 | 0.374987000  | 1                                               | 5.965353000  | 0.006382000  | -0.004092000 |
| 9                                                                | 4.127925000  | 0.102988000  | -1.313594000 | 1                                               | 4.521479000  | -0.199812000 | 1.011786000  |
| CF <sub>2</sub> Cl <sub>2</sub> /B <sub>12</sub> N <sub>12</sub> |              |              |              | N <sub>2</sub> /B <sub>12</sub> N <sub>12</sub> |              |              |              |
| 5                                                                | 0.453209000  | -0.336967000 | -0.555717000 | 5                                               | -1.707746000 | -0.157167000 | -0.000273000 |
| 5                                                                | 0.094919000  | -0.159419000 | 1.312633000  | 5                                               | -0.983767000 | 1.612389000  | 0.002544000  |
| 7                                                                | 0.277909000  | -1.376453000 | 0.487277000  | 7                                               | -1.489565000 | 0.791152000  | -1.122244000 |
| 7                                                                | 0.576096000  | 0.845893000  | 0.334614000  | 7                                               | -1.489582000 | 0.787592000  | 1.124710000  |
| 7                                                                | -0.151893000 | -0.344789000 | -1.860203000 | 7                                               | -1.351242000 | -1.551730000 | -0.002470000 |
| 7                                                                | -2.341103000 | -0.081431000 | -2.297499000 | 7                                               | 0.736122000  | -2.386575000 | -0.003775000 |
| 5                                                                | -1.402003000 | -1.140467000 | -1.855312000 | 5                                               | -0.248142000 | -1.816180000 | -0.955068000 |
| 5                                                                | -1.149534000 | 0.743683000  | -1.984736000 | 5                                               | -0.248155000 | -1.819199000 | 0.949298000  |
| 5                                                                | -3.371526000 | 0.124376000  | -1.317099000 | 5                                               | 1.946951000  | -1.612742000 | -0.002543000 |
| 5                                                                | -3.724038000 | 0.300115000  | 0.548768000  | 5                                               | 2.655906000  | 0.157607000  | 0.000274000  |
| 7                                                                | -3.854104000 | -0.879919000 | -0.339106000 | 7                                               | 2.451458000  | -0.785600000 | -1.125034000 |
| 7                                                                | -3.556691000 | 1.342549000  | -0.492188000 | 7                                               | 2.451438000  | -0.789165000 | 1.122572000  |
| 7                                                                | -0.936224000 | 0.046621000  | 2.293658000  | 7                                               | 0.226727000  | 2.389041000  | 0.003776000  |
| 7                                                                | -3.125107000 | 0.309679000  | 1.855308000  | 7                                               | 2.313612000  | 1.553702000  | 0.002469000  |
| 5                                                                | -2.126798000 | -0.779454000 | 1.981161000  | 5                                               | 1.209927000  | 1.822894000  | -0.950350000 |
| 5                                                                | -1.874397000 | 1.105813000  | 1.851483000  | 5                                               | 1.209917000  | 1.819874000  | 0.956127000  |
| 5                                                                | -0.969813000 | -2.066761000 | 0.316815000  | 5                                               | -0.404408000 | 0.358778000  | -1.958016000 |
| 7                                                                | -1.712489000 | -2.219251000 | -0.957342000 | 7                                               | 0.063243000  | -1.038347000 | -2.123265000 |
| 5                                                                | -2.826671000 | -1.844267000 | -0.054522000 | 5                                               | 1.365877000  | -0.349842000 | -1.960731000 |
| 7                                                                | -2.127561000 | -2.012080000 | 1.241906000  | 7                                               | 0.898735000  | 1.048029000  | -2.120074000 |
| 5                                                                | -0.451328000 | 1.808245000  | 0.050247000  | 5                                               | -0.404440000 | 0.352570000  | 1.959120000  |
| 7                                                                | -1.150272000 | 1.977204000  | -1.246088000 | 7                                               | 0.063210000  | -1.045065000 | 2.119962000  |
| 5                                                                | -2.307646000 | 2.033034000  | -0.321347000 | 5                                               | 1.365841000  | -0.356058000 | 1.959632000  |
| 7                                                                | -1.565529000 | 2.184607000  | 0.953159000  | 7                                               | 0.898706000  | 1.041310000  | 2.123384000  |
| 6                                                                | 3.773262000  | -0.102919000 | 0.043551000  | 7                                               | -4.414307000 | -0.144214000 | -0.000165000 |
| 9                                                                | 3.182569000  | -0.431187000 | 1.183738000  | 7                                               | -5.471240000 | 0.120639000  | 0.000143000  |
| 9                                                                | 2.980570000  | -0.499339000 | -0.956414000 |                                                 |              |              |              |
| 17                                                               | 5.305697000  | -0.964163000 | -0.079523000 |                                                 |              |              |              |
| 17                                                               | 3.978955000  | 1.640879000  | -0.037157000 |                                                 |              |              |              |
| CHF <sub>3</sub> /B <sub>12</sub> N <sub>12</sub>                |              |              |              | OCS/B <sub>12</sub> N <sub>12</sub>             |              |              |              |
| 5                                                                | 1.060602000  | -0.750204000 | -0.247172000 | 5                                               | -1.061039000 | 2.099255000  | -0.480365000 |
| 5                                                                | 0.224390000  | -1.107392000 | 1.437170000  | 5                                               | 0.471135000  | 1.220168000  | -1.198540000 |
| 7                                                                | 0.368255000  | -1.966337000 | 0.240857000  | 7                                               | -0.832838000 | 1.534085000  | -1.832209000 |
| 7                                                                | 1.178510000  | -0.035431000 | 1.058264000  | 7                                               | 0.335006000  | 2.060660000  | 0.013391000  |
| 7                                                                | 0.857747000  | -0.126893000 | -1.525243000 | 7                                               | -2.242544000 | 1.923197000  | 0.319480000  |
| 7                                                                | -1.000603000 | 0.936742000  | -2.206196000 | 7                                               | -2.894531000 | 0.000271000  | 1.282679000  |
| 5                                                                | -0.482162000 | -0.445655000 | -2.067602000 | 5                                               | -2.935213000 | 0.663837000  | -0.042637000 |
| 5                                                                | 0.204495000  | 1.192987000  | -1.379055000 | 5                                               | -1.941819000 | 1.110800000  | 1.522615000  |
| 5                                                                | -2.196373000 | 1.108483000  | -1.428945000 | 5                                               | -2.199681000 | -1.254819000 | 1.200091000  |
| 5                                                                | -3.019277000 | 0.744553000  | 0.252873000  | 5                                               | -0.669879000 | -2.136184000 | 0.480143000  |
| 7                                                                | -3.144815000 | 0.035757000  | -1.042499000 | 7                                               | -2.066948000 | -2.096876000 | -0.013147000 |
| 7                                                                | -2.338843000 | 1.969773000  | -0.229781000 | 7                                               | -0.895834000 | -1.569956000 | 1.831560000  |

|                                                    |              |              |              |                                                    |              |              |              |
|----------------------------------------------------|--------------|--------------|--------------|----------------------------------------------------|--------------|--------------|--------------|
| 7                                                  | -0.970201000 | -0.936068000 | 2.217236000  | 7                                                  | 1.165655000  | -0.036679000 | -1.281044000 |
| 7                                                  | -2.830687000 | 0.125855000  | 1.537068000  | 7                                                  | 0.511204000  | -1.961436000 | -0.320159000 |
| 5                                                  | -2.173467000 | -1.194738000 | 1.389665000  | 5                                                  | 0.212907000  | -1.146723000 | -1.522767000 |
| 5                                                  | -1.489040000 | 0.446231000  | 2.079294000  | 5                                                  | 1.207432000  | -0.706963000 | 0.043956000  |
| 5                                                  | -0.899486000 | -2.136477000 | -0.415754000 | 5                                                  | -1.607946000 | 0.338596000  | -2.018165000 |
| 7                                                  | -1.262970000 | -1.611491000 | -1.752524000 | 7                                                  | -2.871383000 | 0.003557000  | -1.317914000 |
| 5                                                  | -2.478346000 | -1.236784000 | -0.991848000 | 5                                                  | -2.162551000 | -1.292983000 | -1.201092000 |
| 7                                                  | -2.231271000 | -2.040658000 | 0.229684000  | 7                                                  | -1.067244000 | -1.034163000 | -2.166307000 |
| 5                                                  | 0.505959000  | 1.236573000  | 1.001321000  | 5                                                  | 0.434071000  | 1.258158000  | 1.200161000  |
| 7                                                  | 0.260542000  | 2.038972000  | -0.217377000 | 7                                                  | -0.661129000 | 0.998134000  | 2.165718000  |
| 5                                                  | -1.071131000 | 2.137199000  | 0.425666000  | 5                                                  | -0.120517000 | -0.373898000 | 2.018019000  |
| 7                                                  | -0.708460000 | 1.611362000  | 1.764720000  | 7                                                  | 1.143097000  | -0.040009000 | 1.317827000  |
| 6                                                  | 4.093557000  | 0.006923000  | 0.312940000  | 6                                                  | 3.979645000  | 0.589770000  | -0.000711000 |
| 1                                                  | 3.821517000  | 0.004641000  | 1.364634000  | 16                                                 | 4.497923000  | -0.889490000 | 0.000516000  |
| 9                                                  | 3.597563000  | -1.083481000 | -0.296407000 | 8                                                  | 3.582911000  | 1.666437000  | -0.001277000 |
| 9                                                  | 5.412081000  | 0.000983000  | 0.149632000  |                                                    |              |              |              |
| 9                                                  | 3.595455000  | 1.079039000  | -0.302092000 |                                                    |              |              |              |
| N <sub>2</sub> O/B <sub>12</sub> N <sub>12</sub>   |              |              |              | AsH <sub>3</sub> /B <sub>12</sub> N <sub>12</sub>  |              |              |              |
| 5                                                  | 1.440184000  | -0.674107000 | -0.000077000 | 5                                                  | -0.399275000 | 1.680327000  | -0.001002000 |
| 5                                                  | 1.149622000  | 1.224387000  | 0.000126000  | 5                                                  | -1.430568000 | -0.015430000 | -0.000517000 |
| 7                                                  | 1.450770000  | 0.304815000  | 1.122565000  | 7                                                  | -0.969428000 | 0.924068000  | 1.125409000  |
| 7                                                  | 1.450732000  | 0.305057000  | -1.122529000 | 7                                                  | -0.968992000 | 0.923113000  | -1.127010000 |
| 7                                                  | 0.756135000  | -1.938380000 | -0.000286000 | 7                                                  | 0.856887000  | 2.396203000  | -0.000996000 |
| 7                                                  | -1.469431000 | -2.251021000 | -0.000230000 | 7                                                  | 2.887868000  | 1.426234000  | -0.000136000 |
| 5                                                  | -0.377270000 | -1.933429000 | 0.951687000  | 5                                                  | 1.799782000  | 1.765970000  | 0.950400000  |
| 5                                                  | -0.377383000 | -1.933219000 | -0.952133000 | 5                                                  | 1.800207000  | 1.765194000  | -0.951438000 |
| 5                                                  | -2.460163000 | -1.210726000 | -0.000120000 | 5                                                  | 3.129238000  | 0.009093000  | 0.000506000  |
| 5                                                  | -2.727551000 | 0.677864000  | 0.000115000  | 5                                                  | 2.300623000  | -1.708895000 | 0.000995000  |
| 7                                                  | -2.753472000 | -0.288652000 | 1.123742000  | 7                                                  | 2.861590000  | -0.919242000 | 1.125331000  |
| 7                                                  | -2.753501000 | -0.288382000 | -1.123739000 | 7                                                  | 2.862073000  | -0.920115000 | -1.123682000 |
| 7                                                  | 0.161709000  | 2.267485000  | 0.000238000  | 7                                                  | -0.985502000 | -1.434295000 | 0.000068000  |
| 7                                                  | -2.063490000 | 1.952789000  | 0.000245000  | 7                                                  | 1.045627000  | -2.403026000 | 0.000980000  |
| 5                                                  | -0.928146000 | 1.950085000  | 0.953770000  | 5                                                  | 0.095276000  | -1.756942000 | 0.943004000  |
| 5                                                  | -0.928201000 | 1.950269000  | -0.953317000 | 5                                                  | 0.095782000  | -1.757713000 | -0.942034000 |
| 5                                                  | 0.292688000  | 0.141413000  | 1.958725000  | 5                                                  | 0.083167000  | 0.414845000  | 1.942002000  |
| 7                                                  | -0.494068000 | -1.103838000 | 2.120416000  | 7                                                  | 1.434176000  | 1.014030000  | 2.118211000  |
| 5                                                  | -1.595718000 | -0.125304000 | 1.959829000  | 5                                                  | 1.802946000  | -0.410805000 | 1.957557000  |
| 7                                                  | -0.808963000 | 1.121061000  | 2.121536000  | 7                                                  | 0.456789000  | -1.009751000 | 2.118189000  |
| 5                                                  | 0.292624000  | 0.141821000  | -1.958695000 | 5                                                  | 0.083989000  | 0.413277000  | -1.942751000 |
| 7                                                  | -0.494149000 | -1.103372000 | -2.120691000 | 7                                                  | 1.435092000  | 1.012348000  | -2.118831000 |
| 5                                                  | -1.595790000 | -0.124861000 | -1.959864000 | 5                                                  | 1.803820000  | -0.412343000 | -1.956847000 |
| 7                                                  | -0.809014000 | 1.121534000  | -2.121280000 | 7                                                  | 0.457761000  | -1.011443000 | -2.117627000 |
| 7                                                  | 4.295648000  | 0.020343000  | -0.000041000 | 33                                                 | -3.702527000 | 0.001307000  | -0.000040000 |
| 7                                                  | 4.631719000  | 1.081422000  | -0.000092000 | 1                                                  | -4.395973000 | 1.337982000  | 0.013407000  |
| 8                                                  | 3.921393000  | -1.103375000 | 0.000098000  | 1                                                  | -4.430431000 | -0.661290000 | 1.140003000  |
|                                                    |              |              |              | 1                                                  | -4.432743000 | -0.639576000 | -1.150805000 |
| CH <sub>3</sub> Cl/B <sub>12</sub> N <sub>12</sub> |              |              |              | COCl <sub>2</sub> /B <sub>12</sub> N <sub>12</sub> |              |              |              |
| 5                                                  | -1.418844000 | -0.369262000 | -0.000342000 | 5                                                  | 0.715069000  | -0.675903000 | -0.009849000 |
| 5                                                  | -0.835447000 | 1.462379000  | -0.000413000 | 5                                                  | -0.333498000 | -1.105002000 | -1.556771000 |
| 7                                                  | -1.268832000 | 0.602084000  | -1.123791000 | 7                                                  | 0.601347000  | 0.018949000  | -1.323685000 |
| 7                                                  | -1.269325000 | 0.602361000  | 1.122943000  | 7                                                  | 0.010074000  | -1.930874000 | -0.377655000 |
| 7                                                  | -0.905994000 | -1.716282000 | -0.000102000 | 7                                                  | 0.632436000  | -0.026513000 | 1.278672000  |
| 7                                                  | 1.250054000  | -2.351223000 | 0.000356000  | 7                                                  | -1.174744000 | 0.961360000  | 2.180646000  |
| 5                                                  | 0.214722000  | -1.876537000 | -0.950617000 | 5                                                  | -0.105475000 | 1.252530000  | 1.194929000  |
| 5                                                  | 0.214420000  | -1.876352000 | 0.950851000  | 5                                                  | -0.607731000 | -0.397464000 | 1.995351000  |
| 5                                                  | 2.380392000  | -1.465624000 | 0.000450000  | 5                                                  | -2.468783000 | 1.056468000  | 1.564348000  |
| 5                                                  | 2.919414000  | 0.363840000  | 0.000372000  | 5                                                  | -3.485191000 | 0.614557000  | 0.012435000  |
| 7                                                  | 2.805112000  | -0.595652000 | -1.123478000 | 7                                                  | -2.809916000 | 1.882448000  | 0.380855000  |

|                                                                |              |              |              |                                                                |              |              |              |
|----------------------------------------------------------------|--------------|--------------|--------------|----------------------------------------------------------------|--------------|--------------|--------------|
| 7                                                              | 2.804718000  | -0.595407000 | 1.124369000  | 7                                                              | -3.403883000 | -0.069090000 | 1.325253000  |
| 7                                                              | 0.291157000  | 2.356151000  | -0.000349000 | 7                                                              | -1.629360000 | -1.010287000 | -2.176439000 |
| 7                                                              | 2.447818000  | 1.722159000  | 0.000094000  | 7                                                              | -3.436924000 | -0.023509000 | -1.274470000 |
| 5                                                              | 1.324145000  | 1.883675000  | -0.953444000 | 5                                                              | -2.194804000 | 0.347281000  | -1.994499000 |
| 5                                                              | 1.323837000  | 1.883940000  | 0.953207000  | 5                                                              | -2.697680000 | -1.307044000 | -1.193328000 |
| 5                                                              | -0.146514000 | 0.271346000  | -1.957594000 | 5                                                              | -0.117727000 | 1.253442000  | -1.204631000 |
| 7                                                              | 0.451664000  | -1.074000000 | -2.120476000 | 7                                                              | -0.239911000 | 2.077115000  | 0.023654000  |
| 5                                                              | 1.683088000  | -0.265997000 | -1.959540000 | 5                                                              | -1.648916000 | 2.094772000  | -0.440109000 |
| 7                                                              | 1.086068000  | 1.081766000  | -2.121586000 | 7                                                              | -1.440123000 | 1.556154000  | -1.804793000 |
| 5                                                              | -0.147199000 | 0.271824000  | 1.957114000  | 5                                                              | -1.148672000 | -2.142796000 | 0.441207000  |
| 7                                                              | 0.450891000  | -1.073476000 | 2.120565000  | 7                                                              | -1.362153000 | -1.606068000 | 1.807333000  |
| 5                                                              | 1.682410000  | -0.265527000 | 1.959966000  | 5                                                              | -2.683915000 | -1.308419000 | 1.207166000  |
| 7                                                              | 1.085304000  | 1.082270000  | 2.121433000  | 7                                                              | -2.559112000 | -2.127274000 | -0.021651000 |
| 6                                                              | -4.379799000 | 1.112246000  | -0.000091000 | 6                                                              | 3.871675000  | -0.279160000 | -0.015532000 |
| 1                                                              | -3.894096000 | 1.496859000  | -0.892708000 | 17                                                             | 5.591277000  | -0.549037000 | 0.023101000  |
| 17                                                             | -4.179392000 | -0.668812000 | 0.000073000  | 17                                                             | 3.446259000  | 1.406816000  | -0.009922000 |
| 1                                                              | -5.443372000 | 1.329574000  | -0.007421000 | 8                                                              | 3.088043000  | -1.154533000 | -0.042017000 |
| 1                                                              | -3.906632000 | 1.496106000  | 0.899541000  |                                                                |              |              |              |
| C <sub>2</sub> H <sub>2</sub> /B <sub>12</sub> N <sub>12</sub> |              |              |              | C <sub>2</sub> H <sub>4</sub> /B <sub>12</sub> N <sub>12</sub> |              |              |              |
| 5                                                              | 0.874608000  | 1.607330000  | -0.623372000 | 5                                                              | -0.817488000 | -0.000381000 | 1.729990000  |
| 5                                                              | 1.764341000  | 0.001676000  | -0.070170000 | 5                                                              | -1.718750000 | -0.000065000 | 0.034788000  |
| 7                                                              | 1.415436000  | 0.491627000  | -1.430700000 | 7                                                              | -1.393536000 | -1.123622000 | 0.957270000  |
| 7                                                              | 1.483410000  | 1.257077000  | 0.680263000  | 7                                                              | -1.393595000 | 1.123133000  | 0.957721000  |
| 7                                                              | -0.394648000 | 2.256802000  | -0.817435000 | 7                                                              | 0.455753000  | -0.000484000 | 2.401906000  |
| 7                                                              | -2.404021000 | 1.331148000  | -0.418808000 | 7                                                              | 2.462702000  | -0.000228000 | 1.388085000  |
| 5                                                              | -1.355123000 | 1.333655000  | -1.467090000 | 5                                                              | 1.385759000  | -0.953008000 | 1.750548000  |
| 5                                                              | -1.297810000 | 1.980858000  | 0.324955000  | 5                                                              | 1.385706000  | 0.952346000  | 1.750931000  |
| 5                                                              | -2.627576000 | -0.001853000 | 0.069979000  | 5                                                              | 2.680927000  | 0.000064000  | -0.032602000 |
| 5                                                              | -1.773747000 | -1.613766000 | 0.625459000  | 5                                                              | 1.820523000  | 0.000383000  | -1.734510000 |
| 7                                                              | -2.378728000 | -1.256046000 | -0.680218000 | 7                                                              | 2.395243000  | -1.123674000 | -0.956559000 |
| 7                                                              | -2.311583000 | -0.492380000 | 1.432877000  | 7                                                              | 2.395181000  | 1.124163000  | -0.956108000 |
| 7                                                              | 1.506469000  | -1.332832000 | 0.418560000  | 7                                                              | -1.460544000 | 0.000227000  | -1.387647000 |
| 7                                                              | -0.503744000 | -2.257752000 | 0.817835000  | 7                                                              | 0.547621000  | 0.000481000  | -2.400815000 |
| 5                                                              | 0.400182000  | -1.978038000 | -0.323965000 | 5                                                              | -0.384095000 | -0.950025000 | -1.746450000 |
| 5                                                              | 0.458938000  | -1.332613000 | 1.464622000  | 5                                                              | -0.384145000 | 0.950679000  | -1.746066000 |
| 5                                                              | 0.347070000  | -0.272068000 | -2.008710000 | 5                                                              | -0.350878000 | -1.955851000 | 0.430483000  |
| 7                                                              | -1.014270000 | 0.229594000  | -2.321607000 | 7                                                              | 1.007868000  | -2.121303000 | 1.003531000  |
| 5                                                              | -1.358411000 | -1.058216000 | -1.673947000 | 5                                                              | 1.351142000  | -1.959751000 | -0.429096000 |
| 7                                                              | -0.008537000 | -1.670661000 | -1.667187000 | 7                                                              | -0.006569000 | -2.120728000 | -1.002186000 |
| 5                                                              | 0.464105000  | 1.058047000  | 1.670955000  | 5                                                              | -0.350977000 | 1.955622000  | 0.431273000  |
| 7                                                              | -0.887548000 | 1.671082000  | 1.666978000  | 7                                                              | 1.007760000  | 2.120919000  | 1.004386000  |
| 5                                                              | -1.240738000 | 0.273311000  | 2.011239000  | 5                                                              | 1.351041000  | 1.959975000  | -0.428306000 |
| 7                                                              | 0.118849000  | -0.229057000 | 2.320684000  | 7                                                              | -0.006679000 | 2.121109000  | -1.001333000 |
| 6                                                              | 4.600083000  | -0.597587000 | -0.001101000 | 6                                                              | -4.496194000 | -0.664060000 | -0.006732000 |
| 6                                                              | 4.598160000  | 0.600166000  | -0.001817000 | 6                                                              | -4.496168000 | 0.664072000  | -0.006718000 |
| 1                                                              | 4.591836000  | -1.662341000 | 0.004725000  | 1                                                              | -4.673915000 | -1.233570000 | 0.898221000  |
| 1                                                              | 4.591921000  | 1.665027000  | 0.004312000  | 1                                                              | -4.673862000 | 1.233571000  | 0.898248000  |
|                                                                |              |              |              | 1                                                              | -4.310135000 | 1.228487000  | -0.914208000 |
|                                                                |              |              |              | 1                                                              | -4.310181000 | -1.228463000 | -0.914234000 |
| H <sub>2</sub> Se/B <sub>12</sub> N <sub>12</sub>              |              |              |              | H <sub>2</sub> S/B <sub>12</sub> N <sub>12</sub>               |              |              |              |
| 5                                                              | -1.378923000 | 0.006060000  | -0.004789000 | 5                                                              | -1.847173000 | 0.003696000  | 0.035001000  |
| 5                                                              | -0.375837000 | 1.678225000  | 0.240508000  | 5                                                              | -0.827931000 | -1.658225000 | -0.292386000 |
| 7                                                              | -0.948731000 | 1.090418000  | -0.982298000 | 7                                                              | -1.386201000 | -1.123688000 | 0.959824000  |
| 7                                                              | -0.954186000 | 0.766484000  | 1.244447000  | 7                                                              | -1.416625000 | -0.708094000 | -1.252778000 |
| 7                                                              | -0.986467000 | -1.400695000 | -0.206839000 | 7                                                              | -1.421914000 | 1.400891000  | 0.286846000  |
| 7                                                              | 1.035323000  | -2.377890000 | -0.344827000 | 7                                                              | 0.606953000  | 2.362089000  | 0.440663000  |
| 5                                                              | 0.093777000  | -1.597700000 | -1.188339000 | 5                                                              | -0.329730000 | 1.551064000  | 1.261075000  |
| 5                                                              | 0.090622000  | -1.868792000 | 0.681049000  | 5                                                              | -0.352771000 | 1.897042000  | -0.592518000 |

|                                                   |              |              |              |                                                   |              |              |              |
|---------------------------------------------------|--------------|--------------|--------------|---------------------------------------------------|--------------|--------------|--------------|
| 5                                                 | 2.296874000  | -1.702040000 | -0.243807000 | 5                                                 | 1.863433000  | 1.685613000  | 0.297358000  |
| 5                                                 | 3.139514000  | -0.009085000 | 0.003807000  | 5                                                 | 2.696086000  | 0.000906000  | -0.029091000 |
| 7                                                 | 2.866446000  | -0.764263000 | -1.242347000 | 7                                                 | 2.440727000  | 0.705502000  | 1.249972000  |
| 7                                                 | 2.861633000  | -1.087394000 | 0.983064000  | 7                                                 | 2.411345000  | 1.119318000  | -0.960381000 |
| 7                                                 | 0.886179000  | 2.371916000  | 0.344644000  | 7                                                 | 0.428778000  | -2.354959000 | -0.440290000 |
| 7                                                 | 2.908246000  | 1.395114000  | 0.207110000  | 7                                                 | 2.457176000  | -1.393086000 | -0.286857000 |
| 5                                                 | 1.826153000  | 1.877038000  | -0.687016000 | 5                                                 | 1.382867000  | -1.906505000 | 0.599540000  |
| 5                                                 | 1.822230000  | 1.603517000  | 1.196360000  | 5                                                 | 1.358462000  | -1.556575000 | -1.270643000 |
| 5                                                 | 0.101654000  | 0.696977000  | -1.867254000 | 5                                                 | -0.323848000 | -0.769482000 | 1.845326000  |
| 7                                                 | 0.464528000  | -0.691408000 | -2.241618000 | 7                                                 | 0.049456000  | 0.600830000  | 2.272101000  |
| 5                                                 | 1.814828000  | -0.132987000 | -1.995243000 | 5                                                 | 1.394462000  | 0.048031000  | 1.988269000  |
| 7                                                 | 1.457488000  | 1.303491000  | -1.951074000 | 7                                                 | 1.030935000  | -1.384112000 | 1.889900000  |
| 5                                                 | 0.094028000  | 0.137714000  | 1.984021000  | 5                                                 | -0.373466000 | -0.054177000 | -1.975368000 |
| 7                                                 | 0.455350000  | -1.300369000 | 1.951324000  | 7                                                 | -0.005774000 | 1.380175000  | -1.889837000 |
| 5                                                 | 1.806874000  | -0.695591000 | 1.879923000  | 5                                                 | 1.344064000  | 0.768154000  | -1.859341000 |
| 7                                                 | 1.448398000  | 0.694472000  | 2.244081000  | 7                                                 | 0.975762000  | -0.604409000 | -2.275826000 |
| 34                                                | -3.801067000 | -0.010838000 | -0.055981000 | 16                                                | -4.043460000 | 0.023497000  | 0.097937000  |
| 1                                                 | -3.956585000 | 1.230933000  | 0.710819000  | 1                                                 | -4.220693000 | -1.155434000 | -0.521502000 |
| 1                                                 | -3.925539000 | -0.828270000 | 1.156771000  | 1                                                 | -4.200553000 | 0.728585000  | -1.034957000 |
| PH <sub>3</sub> /B <sub>12</sub> N <sub>12</sub>  |              |              |              | COF <sub>2</sub> /B <sub>12</sub> N <sub>12</sub> |              |              |              |
| 5                                                 | -0.826629000 | 1.677701000  | -0.000592000 | 5                                                 | 1.175739000  | -0.627061000 | 0.024232000  |
| 5                                                 | -1.893553000 | -0.014737000 | 0.000036000  | 5                                                 | 0.149012000  | -1.095553000 | -1.525785000 |
| 7                                                 | -1.398986000 | 0.928048000  | 1.127214000  | 7                                                 | 1.069272000  | 0.043700000  | -1.304040000 |
| 7                                                 | -1.398983000 | 0.927152000  | -1.127800000 | 7                                                 | 0.488120000  | -1.894894000 | -0.327740000 |
| 7                                                 | 0.429999000  | 2.395962000  | -0.000900000 | 7                                                 | 1.072684000  | 0.048694000  | 1.298296000  |
| 7                                                 | 2.460832000  | 1.424355000  | -0.000591000 | 7                                                 | -0.757064000 | 1.031045000  | 2.161254000  |
| 5                                                 | 1.372533000  | 1.764932000  | 0.949826000  | 5                                                 | 0.319037000  | 1.316609000  | 1.181344000  |
| 5                                                 | 1.372453000  | 1.764209000  | -0.951203000 | 5                                                 | -0.171364000 | -0.323582000 | 2.008647000  |
| 5                                                 | 2.699749000  | 0.006763000  | -0.000039000 | 5                                                 | -2.045736000 | 1.098562000  | 1.529916000  |
| 5                                                 | 1.869266000  | -1.710367000 | 0.000630000  | 5                                                 | -3.040292000 | 0.614493000  | -0.023571000 |
| 7                                                 | 2.431602000  | -0.921288000 | 1.124974000  | 7                                                 | -2.384676000 | 1.897372000  | 0.327261000  |
| 7                                                 | 2.431539000  | -0.922137000 | -1.124321000 | 7                                                 | -2.964678000 | -0.042689000 | -1.303178000 |
| 7                                                 | -1.418156000 | -1.436743000 | 0.000587000  | 7                                                 | -1.141008000 | -1.029112000 | -2.160811000 |
| 7                                                 | 0.614603000  | -2.403828000 | 0.000899000  | 7                                                 | -2.970232000 | -0.047704000 | -1.297352000 |
| 5                                                 | -0.336666000 | -1.755550000 | 0.941318000  | 5                                                 | -1.724925000 | 0.324550000  | -2.011409000 |
| 5                                                 | -0.336727000 | -1.756213000 | -0.939959000 | 5                                                 | -2.216499000 | -1.320043000 | -1.183343000 |
| 5                                                 | -0.346526000 | 0.416462000  | 1.939399000  | 5                                                 | 0.332409000  | 1.271080000  | -1.216407000 |
| 7                                                 | 1.006189000  | 1.013545000  | 2.117514000  | 7                                                 | 0.185712000  | 2.115746000  | -0.006495000 |
| 5                                                 | 1.372589000  | -0.411511000 | 1.956465000  | 5                                                 | -1.217423000 | 2.107751000  | -0.485448000 |
| 7                                                 | 0.025761000  | -1.008751000 | 2.116946000  | 7                                                 | -0.986891000 | 1.545653000  | -1.837451000 |
| 5                                                 | -0.346612000 | 0.415002000  | -1.939756000 | 5                                                 | -0.676153000 | -2.105456000 | 0.483050000  |
| 7                                                 | 1.006097000  | 1.011940000  | -2.118328000 | 7                                                 | -0.909566000 | -1.544679000 | 1.836165000  |
| 5                                                 | 1.372486000  | -0.412999000 | -1.956159000 | 5                                                 | -2.228558000 | -1.274946000 | 1.216864000  |
| 7                                                 | 0.025667000  | -1.010371000 | -2.116197000 | 7                                                 | -2.081361000 | -2.115922000 | 0.005471000  |
| 15                                                | -3.971541000 | 0.003906000  | 0.000044000  | 6                                                 | 4.187647000  | -0.112085000 | 0.001766000  |
| 1                                                 | -4.580288000 | 1.267435000  | -0.000439000 | 9                                                 | 5.489110000  | -0.053773000 | -0.013839000 |
| 1                                                 | -4.610860000 | -0.614560000 | 1.084905000  | 9                                                 | 3.716888000  | 1.103907000  | 0.005855000  |
| 1                                                 | -4.610714000 | -0.615107000 | -1.084950000 | 8                                                 | 3.550213000  | -1.095149000 | 0.010831000  |
| CH <sub>3</sub> F/B <sub>12</sub> N <sub>12</sub> |              |              |              | HCHO/B <sub>12</sub> N <sub>12</sub>              |              |              |              |
| 5                                                 | -1.700764000 | -0.358081000 | 0.000606000  | 5                                                 | -1.925960000 | -0.305421000 | -0.000070000 |
| 5                                                 | -1.068560000 | 1.471167000  | 0.021721000  | 5                                                 | -0.662737000 | -1.839096000 | 0.000276000  |
| 7                                                 | -1.514083000 | 0.632837000  | -1.111293000 | 7                                                 | -1.325060000 | -1.162189000 | 1.125044000  |
| 7                                                 | -1.508896000 | 0.605057000  | 1.135291000  | 7                                                 | -1.324898000 | -1.162503000 | -1.124767000 |
| 7                                                 | -1.163048000 | -1.701948000 | -0.017565000 | 7                                                 | -1.663799000 | 1.173562000  | -0.000271000 |
| 7                                                 | 0.989393000  | -2.352570000 | -0.030447000 | 7                                                 | 0.229613000  | 2.396086000  | -0.000370000 |
| 5                                                 | -0.047538000 | -1.855610000 | -0.969991000 | 5                                                 | -0.625688000 | 1.631466000  | 0.941025000  |
| 5                                                 | -0.043326000 | -1.879110000 | 0.925594000  | 5                                                 | -0.625621000 | 1.631184000  | -0.941616000 |
| 5                                                 | 2.124108000  | -1.474154000 | -0.021855000 | 5                                                 | 1.567554000  | 1.875473000  | -0.000243000 |

|                                                                   |              |              |              |                                                                  |              |              |              |
|-------------------------------------------------------------------|--------------|--------------|--------------|------------------------------------------------------------------|--------------|--------------|--------------|
| 5                                                                 | 2.676869000  | 0.351416000  | -0.000531000 | 5                                                                | 2.616564000  | 0.284235000  | 0.000052000  |
| 7                                                                 | 2.553219000  | -0.592963000 | -1.136092000 | 7                                                                | 2.227675000  | 1.170635000  | 1.124670000  |
| 7                                                                 | 2.558350000  | -0.620871000 | 1.111949000  | 7                                                                | 2.227798000  | 1.170295000  | -1.124880000 |
| 7                                                                 | 0.063312000  | 2.360993000  | 0.030249000  | 7                                                                | 0.680563000  | -2.381198000 | 0.000375000  |
| 7                                                                 | 2.216591000  | 1.713550000  | 0.017374000  | 7                                                                | 2.565928000  | -1.151225000 | 0.000273000  |
| 5                                                                 | 1.090457000  | 1.894014000  | -0.930655000 | 5                                                                | 1.530610000  | -1.632044000 | 0.950665000  |
| 5                                                                 | 1.094832000  | 1.870441000  | 0.974804000  | 5                                                                | 1.530679000  | -1.632337000 | -0.950060000 |
| 5                                                                 | -0.395770000 | 0.305567000  | -1.947719000 | 5                                                                | -0.351586000 | -0.523089000 | 1.939053000  |
| 7                                                                 | 0.192909000  | -1.041541000 | -2.131967000 | 7                                                                | -0.169441000 | 0.941617000  | 2.115692000  |
| 5                                                                 | 1.430123000  | -0.244684000 | -1.964013000 | 5                                                                | 1.244745000  | 0.525412000  | 1.956501000  |
| 7                                                                 | 0.843369000  | 1.109253000  | -2.108226000 | 7                                                                | 1.069203000  | -0.933838000 | 2.118317000  |
| 5                                                                 | -0.386904000 | 0.257315000  | 1.958418000  | 5                                                                | -0.351399000 | -0.523689000 | -1.938959000 |
| 7                                                                 | 0.202401000  | -1.093969000 | 2.106385000  | 7                                                                | -0.169238000 | 0.940968000  | -2.116026000 |
| 5                                                                 | 1.438972000  | -0.293177000 | 1.953205000  | 5                                                                | 1.244936000  | 0.524805000  | -1.956598000 |
| 7                                                                 | 0.852941000  | 1.056794000  | 2.133598000  | 7                                                                | 1.069399000  | -0.934500000 | -2.117977000 |
| 6                                                                 | -4.528058000 | 0.497077000  | -0.001615000 | 6                                                                | -4.338756000 | 0.382012000  | 0.000061000  |
| 1                                                                 | -4.267022000 | 1.063080000  | -0.893980000 | 1                                                                | -5.408928000 | 0.163378000  | 0.000089000  |
| 9                                                                 | -3.752314000 | -0.670964000 | 0.002755000  | 1                                                                | -3.955712000 | 1.407335000  | 0.000178000  |
| 1                                                                 | -5.571454000 | 0.190819000  | -0.016467000 | 8                                                                | -3.560938000 | -0.552654000 | -0.000164000 |
| 1                                                                 | -4.290062000 | 1.054439000  | 0.902613000  |                                                                  |              |              |              |
| (CH <sub>3</sub> ) <sub>2</sub> O/B <sub>12</sub> N <sub>12</sub> |              |              |              | CH <sub>3</sub> NH <sub>2</sub> /B <sub>12</sub> N <sub>12</sub> |              |              |              |
| 5                                                                 | 1.724472000  | -0.015098000 | -0.221397000 | 5                                                                | 0.690818000  | -1.043045000 | -1.437748000 |
| 5                                                                 | 0.703362000  | -1.443036000 | 0.750307000  | 5                                                                | 1.914764000  | -0.390939000 | 0.024956000  |
| 7                                                                 | 1.163192000  | -1.392108000 | -0.645266000 | 7                                                                | 1.152916000  | -1.732799000 | -0.226385000 |
| 7                                                                 | 1.341217000  | -0.229101000 | 1.278289000  | 7                                                                | 1.481435000  | 0.193190000  | -1.360907000 |
| 7                                                                 | 1.181903000  | 1.208922000  | -0.899281000 | 7                                                                | -0.606039000 | -1.193691000 | -2.068228000 |
| 7                                                                 | -0.877982000 | 2.058220000  | -1.227308000 | 7                                                                | -2.535596000 | -0.378962000 | -1.241428000 |
| 5                                                                 | 0.023975000  | 1.009559000  | -1.776692000 | 5                                                                | -1.624888000 | -1.537192000 | -1.052461000 |
| 5                                                                 | 0.164716000  | 1.974310000  | -0.172058000 | 5                                                                | -1.349360000 | 0.083372000  | -2.005940000 |
| 5                                                                 | -2.102161000 | 1.475417000  | -0.763775000 | 5                                                                | -2.657359000 | 0.363089000  | -0.016425000 |
| 5                                                                 | -2.868971000 | 0.013008000  | 0.190796000  | 5                                                                | -1.702041000 | 1.076958000  | 1.472292000  |
| 7                                                                 | -2.721758000 | 0.225258000  | -1.269153000 | 7                                                                | -2.482511000 | -0.179868000 | 1.352391000  |
| 7                                                                 | -2.547316000 | 1.385854000  | 0.650063000  | 7                                                                | -2.156052000 | 1.738378000  | 0.223304000  |
| 7                                                                 | -0.521104000 | -2.050325000 | 1.226479000  | 7                                                                | 1.521937000  | 0.400620000  | 1.254219000  |
| 7                                                                 | -2.581115000 | -1.203908000 | 0.900320000  | 7                                                                | -0.411489000 | 1.214651000  | 2.079119000  |
| 5                                                                 | -1.556677000 | -1.993839000 | 0.170832000  | 5                                                                | 0.342590000  | -0.064488000 | 1.990863000  |
| 5                                                                 | -1.410825000 | -1.013719000 | 1.793809000  | 5                                                                | 0.614157000  | 1.533615000  | 1.050842000  |
| 5                                                                 | 0.033289000  | -1.365751000 | -1.511961000 | 5                                                                | 0.035827000  | -1.994925000 | 0.613200000  |
| 7                                                                 | -0.404109000 | -0.233140000 | -2.363669000 | 7                                                                | -1.374061000 | -2.221531000 | 0.184406000  |
| 5                                                                 | -1.711209000 | -0.649286000 | -1.806099000 | 5                                                                | -1.597130000 | -1.315869000 | 1.333102000  |
| 7                                                                 | -1.308260000 | -1.957458000 | -1.242279000 | 7                                                                | -0.244749000 | -1.377869000 | 1.934712000  |
| 5                                                                 | 0.332657000  | 0.631819000  | 1.797265000  | 5                                                                | 0.597044000  | 1.306213000  | -1.330087000 |
| 7                                                                 | -0.076100000 | 1.949031000  | 1.247299000  | 7                                                                | -0.759723000 | 1.390892000  | -1.941860000 |
| 5                                                                 | -1.409483000 | 1.368195000  | 1.532257000  | 5                                                                | -1.029947000 | 2.018710000  | -0.629465000 |
| 7                                                                 | -0.981466000 | 0.227866000  | 2.373069000  | 7                                                                | 0.369130000  | 2.227436000  | -0.187465000 |
| 8                                                                 | 3.323950000  | -0.004644000 | -0.366830000 | 7                                                                | 3.505528000  | -0.655753000 | 0.028790000  |
| 6                                                                 | 3.923779000  | 1.206049000  | 0.136716000  | 1                                                                | 3.716649000  | -1.262453000 | -0.762835000 |
| 1                                                                 | 3.788257000  | 1.243793000  | 1.219780000  | 1                                                                | 3.729204000  | -1.178596000 | 0.875160000  |
| 1                                                                 | 4.979126000  | 1.190803000  | -0.129290000 | 6                                                                | 4.293917000  | 0.597194000  | -0.037986000 |
| 1                                                                 | 3.410839000  | 2.028731000  | -0.350777000 | 1                                                                | 4.006643000  | 1.117798000  | -0.949569000 |
| 6                                                                 | 3.993973000  | -1.190718000 | 0.105859000  | 1                                                                | 4.024602000  | 1.203267000  | 0.824481000  |
| 1                                                                 | 3.895259000  | -1.246447000 | 1.191502000  | 1                                                                | 5.361939000  | 0.386459000  | -0.039642000 |
| 1                                                                 | 3.505104000  | -2.032387000 | -0.373659000 |                                                                  |              |              |              |
| 1                                                                 | 5.037865000  | -1.121011000 | -0.194721000 |                                                                  |              |              |              |



Table S4. Cartesian coordinates for the gas-adsorbed Al<sub>12</sub>N<sub>12</sub> nanocages

| SiH <sub>4</sub> /Al <sub>12</sub> N <sub>12</sub> |              |              |              | H <sub>2</sub> /Al <sub>12</sub> N <sub>12</sub> |              |              |              |
|----------------------------------------------------|--------------|--------------|--------------|--------------------------------------------------|--------------|--------------|--------------|
| 13                                                 | -0.467368000 | -2.466762000 | 0.864677000  | 13                                               | 2.761350000  | -0.050911000 | -0.060821000 |
| 13                                                 | 1.406856000  | -2.459963000 | -0.754816000 | 13                                               | 1.581418000  | 1.019090000  | -1.967309000 |
| 7                                                  | 1.364898000  | -2.585577000 | 1.087322000  | 7                                                | 2.348376000  | 1.716321000  | -0.439279000 |
| 7                                                  | -0.414250000 | -2.688602000 | -0.970501000 | 7                                                | 2.271937000  | -0.677230000 | -1.734397000 |
| 7                                                  | -1.562781000 | -1.380094000 | 1.755029000  | 7                                                | 2.374969000  | -0.879180000 | 1.478664000  |
| 7                                                  | -1.643350000 | 1.343489000  | 1.693233000  | 7                                                | -0.048580000 | -1.415372000 | 2.606000000  |
| 13                                                 | -0.659547000 | 0.027535000  | 2.532355000  | 13                                               | 1.119841000  | 0.012614000  | 2.497536000  |
| 13                                                 | -2.347431000 | -0.063665000 | 0.706651000  | 13                                               | 1.052690000  | -2.157350000 | 1.320151000  |
| 13                                                 | -0.610451000 | 2.450294000  | 0.754259000  | 13                                               | -1.672506000 | -1.024803000 | 1.979593000  |
| 13                                                 | 1.264097000  | 2.476369000  | -0.865420000 | 13                                               | -2.805924000 | 0.052972000  | 0.059580000  |
| 7                                                  | 1.212563000  | 2.684182000  | 0.968972000  | 7                                                | -2.351972000 | 0.676974000  | 1.738486000  |
| 7                                                  | -0.566266000 | 2.590895000  | -1.089460000 | 7                                                | -2.427271000 | -1.715256000 | 0.440355000  |
| 7                                                  | 2.435572000  | -1.342783000 | -1.694075000 | 7                                                | -0.039015000 | 1.414185000  | -2.604021000 |
| 7                                                  | 2.356453000  | 1.378962000  | -1.754736000 | 7                                                | -2.463063000 | 0.880172000  | -1.484388000 |
| 13                                                 | 3.076294000  | 0.061233000  | -0.676976000 | 13                                               | -1.141170000 | 2.161426000  | -1.323641000 |
| 13                                                 | 1.459126000  | -0.027583000 | -2.548705000 | 13                                               | -1.206332000 | -0.013686000 | -2.503246000 |
| 13                                                 | 2.048298000  | -1.147708000 | 1.893365000  | 13                                               | 1.125732000  | 2.406361000  | 0.661095000  |
| 7                                                  | 1.091560000  | 0.085027000  | 2.879836000  | 7                                                | 0.651253000  | 1.724700000  | 2.312384000  |
| 13                                                 | 1.977002000  | 1.325360000  | 1.836332000  | 13                                               | -1.075832000 | 1.924371000  | 1.688603000  |
| 7                                                  | 3.156553000  | 0.104440000  | 1.104825000  | 7                                                | -0.593226000 | 2.908673000  | 0.201235000  |
| 13                                                 | -1.175919000 | -1.321000000 | -1.826369000 | 13                                               | 0.992738000  | -1.919045000 | -1.684093000 |
| 7                                                  | -2.357625000 | -0.103063000 | -1.097116000 | 7                                                | 0.507048000  | -2.911831000 | -0.202347000 |
| 13                                                 | -1.246299000 | 1.145059000  | -1.883877000 | 13                                               | -1.210490000 | -2.412637000 | -0.664395000 |
| 7                                                  | -0.292496000 | -0.084699000 | -2.879481000 | 7                                                | -0.735496000 | -1.723567000 | -2.311440000 |
| 14                                                 | -5.274642000 | 0.000532000  | -0.041343000 | 1                                                | 4.874669000  | 0.309110000  | -0.259444000 |
| 1                                                  | -4.248462000 | -0.116263000 | 1.065198000  | 1                                                | 4.880921000  | -0.278478000 | 0.210964000  |
| 1                                                  | -5.200961000 | -1.203533000 | -0.878881000 |                                                  |              |              |              |
| 1                                                  | -6.543949000 | 0.045731000  | 0.715752000  |                                                  |              |              |              |
| 1                                                  | -5.048020000 | 1.262188000  | -0.759382000 |                                                  |              |              |              |
| Cl <sub>2</sub> /Al <sub>12</sub> N <sub>12</sub>  |              |              |              | F <sub>2</sub> /Al <sub>12</sub> N <sub>12</sub> |              |              |              |
| 13                                                 | 2.056426000  | -0.527730000 | -0.190532000 | 13                                               | 2.409722000  | 0.039441000  | -0.020630000 |
| 13                                                 | 1.023723000  | 1.070470000  | -1.839145000 | 13                                               | 1.240023000  | 1.349417000  | -1.773518000 |
| 7                                                  | 1.898025000  | 1.367651000  | -0.227182000 | 7                                                | 1.957320000  | 1.832472000  | -0.139889000 |
| 7                                                  | 1.423544000  | -0.719318000 | -1.915939000 | 7                                                | 1.977958000  | -0.342533000 | -1.778909000 |
| 7                                                  | 1.519967000  | -1.516966000 | 1.195006000  | 7                                                | 2.051275000  | -1.021053000 | 1.372195000  |
| 7                                                  | -0.937818000 | -1.858908000 | 2.312474000  | 7                                                | -0.365380000 | -1.792636000 | 2.366774000  |
| 13                                                 | 0.450251000  | -0.644287000 | 2.414989000  | 13                                               | 0.756643000  | -0.329237000 | 2.491947000  |
| 13                                                 | 0.010990000  | -2.523448000 | 0.871004000  | 13                                               | 0.773902000  | -2.302435000 | 1.003578000  |
| 13                                                 | -2.479967000 | -1.105966000 | 1.828338000  | 13                                               | -1.993766000 | -1.362165000 | 1.778659000  |
| 13                                                 | -3.441666000 | 0.472215000  | 0.179295000  | 13                                               | -3.136434000 | -0.044419000 | 0.020629000  |
| 7                                                  | -2.872270000 | 0.697645000  | 1.922858000  | 7                                                | -2.726031000 | 0.334527000  | 1.782148000  |
| 7                                                  | -3.355249000 | -1.372065000 | 0.222813000  | 7                                                | -2.705927000 | -1.837060000 | 0.140349000  |
| 7                                                  | -0.515664000 | 1.835668000  | -2.303160000 | 7                                                | -0.386298000 | 1.785592000  | -2.366246000 |
| 7                                                  | -2.981829000 | 1.504481000  | -1.202623000 | 7                                                | -2.802679000 | 1.015489000  | -1.375907000 |
| 13                                                 | -1.467587000 | 2.504955000  | -0.868813000 | 13                                               | -1.525319000 | 2.299160000  | -1.005598000 |
| 13                                                 | -1.903428000 | 0.618840000  | -2.413771000 | 13                                               | -1.507367000 | 0.322487000  | -2.496671000 |
| 13                                                 | 0.827777000  | 2.027936000  | 1.052940000  | 13                                               | 0.704261000  | 2.315092000  | 1.034838000  |
| 7                                                  | 0.270575000  | 1.128400000  | 2.557950000  | 7                                                | 0.234088000  | 1.376504000  | 2.555443000  |
| 13                                                 | -1.410898000 | 1.710616000  | 2.052742000  | 13                                               | -1.491380000 | 1.613695000  | 1.939718000  |
| 7                                                  | -0.785769000 | 2.858977000  | 0.742556000  | 7                                                | -1.024055000 | 2.824746000  | 0.624452000  |
| 13                                                 | -0.040699000 | -1.735778000 | -2.038186000 | 13                                               | 0.741305000  | -1.617949000 | -1.935396000 |
| 7                                                  | -0.668259000 | -2.887534000 | -0.739287000 | 7                                                | 0.271976000  | -2.833500000 | -0.624891000 |
| 13                                                 | -2.283851000 | -2.045066000 | -1.035989000 | 13                                               | -1.455302000 | -2.323825000 | -1.036284000 |
| 7                                                  | -1.716738000 | -1.148427000 | -2.550287000 | 7                                                | -0.984228000 | -1.382328000 | -2.554765000 |
| 17                                                 | 4.177128000  | 0.602684000  | -0.072671000 | 9                                                | 4.558957000  | 0.586440000  | -0.006495000 |

|                                                                   |              |              |              |                                                   |              |              |              |
|-------------------------------------------------------------------|--------------|--------------|--------------|---------------------------------------------------|--------------|--------------|--------------|
| 17                                                                | 6.035607000  | -0.421687000 | 0.056578000  | 9                                                 | 5.419057000  | -0.496660000 | 0.004071000  |
| CF <sub>4</sub> /Al <sub>12</sub> N <sub>12</sub>                 |              |              |              | CH <sub>4</sub> /Al <sub>12</sub> N <sub>12</sub> |              |              |              |
| 13                                                                | -0.316783000 | -1.851142000 | 1.660088000  | 13                                                | 0.888869000  | 2.463769000  | 0.536886000  |
| 13                                                                | 1.598119000  | -2.645713000 | 0.305736000  | 13                                                | -1.333279000 | 2.466220000  | -0.556570000 |
| 7                                                                 | 1.479026000  | -2.053881000 | 2.051654000  | 7                                                 | -0.824194000 | 2.640531000  | 1.210698000  |
| 7                                                                 | -0.228581000 | -2.760767000 | 0.053570000  | 7                                                 | 0.378341000  | 2.635541000  | -1.230931000 |
| 7                                                                 | -1.304173000 | -0.404272000 | 1.986805000  | 7                                                 | 2.150444000  | 1.367078000  | 1.158439000  |
| 7                                                                 | -1.057294000 | 2.082300000  | 0.903096000  | 7                                                 | 2.151161000  | -1.357270000 | 1.168215000  |
| 13                                                                | -0.267401000 | 1.099362000  | 2.251710000  | 13                                                | 1.440724000  | 0.008374000  | 2.187352000  |
| 13                                                                | -1.863120000 | 0.477751000  | 0.455788000  | 13                                                | 2.589616000  | 0.000757000  | -0.016836000 |
| 13                                                                | 0.130300000  | 2.639646000  | -0.303683000 | 13                                                | 0.890213000  | -2.459076000 | 0.554513000  |
| 13                                                                | 2.046108000  | 1.857833000  | -1.664826000 | 13                                                | -1.331960000 | -2.470965000 | -0.538850000 |
| 7                                                                 | 1.958812000  | 2.757779000  | -0.054048000 | 7                                                 | -0.822741000 | -2.632139000 | 1.229600000  |
| 7                                                                 | 0.250945000  | 2.055112000  | -2.053381000 | 7                                                 | 0.379777000  | -2.643907000 | -1.212023000 |
| 7                                                                 | 2.783225000  | -2.079920000 | -0.903784000 | 7                                                 | -2.589800000 | 1.356577000  | -1.170336000 |
| 7                                                                 | 3.030392000  | 0.404621000  | -1.990495000 | 7                                                 | -2.589053000 | -1.366367000 | -1.160546000 |
| 13                                                                | 3.552370000  | -0.463476000 | -0.444860000 | 13                                                | -2.985311000 | -0.000711000 | 0.019618000  |
| 13                                                                | 1.997924000  | -1.103741000 | -2.262405000 | 13                                                | -1.888610000 | -0.008411000 | -2.200343000 |
| 13                                                                | 2.300953000  | -0.490577000 | 2.306198000  | 13                                                | -1.315423000 | 1.245193000  | 2.208209000  |
| 7                                                                 | 1.465995000  | 1.113657000  | 2.680508000  | 7                                                 | -0.167516000 | 0.010693000  | 2.963211000  |
| 13                                                                | 2.527001000  | 1.767169000  | 1.316955000  | 13                                                | -1.314664000 | -1.229866000 | -2.217036000 |
| 7                                                                 | 3.575320000  | 0.250383000  | 1.190715000  | 7                                                 | -2.612876000 | 0.005650000  | 1.765037000  |
| 13                                                                | -0.795349000 | -1.760680000 | -1.311644000 | 13                                                | 0.869864000  | 1.227359000  | -2.211341000 |
| 7                                                                 | -1.845816000 | -0.248421000 | -1.185385000 | 7                                                 | 2.166076000  | -0.005582000 | -1.757545000 |
| 13                                                                | -0.571329000 | 0.489880000  | -2.298969000 | 13                                                | 0.870496000  | -1.242456000 | -2.202395000 |
| 7                                                                 | 0.264425000  | -1.113974000 | -2.681196000 | 7                                                 | -0.277349000 | -0.010611000 | -2.965337000 |
| 6                                                                 | -4.947008000 | -0.025303000 | -0.025849000 | 6                                                 | 5.257145000  | -0.000421000 | 0.003671000  |
| 9                                                                 | -4.579869000 | -1.276134000 | 0.041389000  | 1                                                 | 4.914870000  | 0.902077000  | 0.518168000  |
| 9                                                                 | -5.002841000 | 0.390017000  | -1.257350000 | 1                                                 | 4.936943000  | -0.006076000 | -1.041570000 |
| 9                                                                 | -4.025347000 | 0.727526000  | 0.644928000  | 1                                                 | 6.346268000  | 0.000766000  | 0.019966000  |
| 9                                                                 | -6.095077000 | 0.149861000  | 0.575205000  | 1                                                 | 4.916194000  | -0.898037000 | 0.527401000  |
| CF <sub>2</sub> Cl <sub>2</sub> /Al <sub>12</sub> N <sub>12</sub> |              |              |              | N <sub>2</sub> /Al <sub>12</sub> N <sub>12</sub>  |              |              |              |
| 13                                                                | 0.432419000  | 1.211841000  | -1.858754000 | 13                                                | 2.520402000  | 0.001602000  | 0.048476000  |
| 13                                                                | 0.136859000  | 2.387211000  | 0.289889000  | 13                                                | 1.372630000  | 0.006493000  | -2.160484000 |
| 7                                                                 | 1.468474000  | 1.273198000  | -0.333345000 | 7                                                 | 2.077013000  | 1.366530000  | -1.131582000 |
| 7                                                                 | -0.696091000 | 2.585173000  | -1.349093000 | 7                                                 | 2.078607000  | -1.357963000 | -1.138476000 |
| 7                                                                 | -0.058943000 | -0.263638000 | -2.734577000 | 7                                                 | 2.058208000  | -0.003086000 | 1.781919000  |
| 7                                                                 | -1.682222000 | -2.265522000 | -1.858741000 | 7                                                 | -0.400008000 | -0.007562000 | 2.963223000  |
| 13                                                                | 0.092159000  | -1.774050000 | -1.678678000 | 13                                                | 0.756259000  | 1.228180000  | 2.218916000  |
| 13                                                                | -1.873055000 | -0.588574000 | -2.609274000 | 13                                                | 0.757795000  | -1.238174000 | 2.212632000  |
| 13                                                                | -2.510571000 | -2.413079000 | -0.285250000 | 13                                                | -2.002462000 | -0.006553000 | 2.181114000  |
| 13                                                                | -2.806391000 | -1.234349000 | 1.870992000  | 13                                                | -3.074524000 | -0.001509000 | -0.050707000 |
| 7                                                                 | -1.677731000 | -2.600777000 | 1.352731000  | 7                                                 | -2.692989000 | 1.357344000  | 1.141981000  |
| 7                                                                 | -3.842957000 | -1.295625000 | 0.341463000  | 7                                                 | -2.691386000 | -1.365936000 | 1.135144000  |
| 7                                                                 | -0.691979000 | 2.252455000  | 1.865016000  | 7                                                 | -0.223769000 | 0.007531000  | -2.960878000 |
| 7                                                                 | -2.314062000 | 0.247218000  | 2.734640000  | 7                                                 | -2.683613000 | 0.003106000  | -1.792132000 |
| 13                                                                | -0.497298000 | 0.569871000  | 2.606805000  | 13                                                | -1.380857000 | 1.242384000  | -2.221244000 |
| 13                                                                | -2.464696000 | 1.763449000  | 1.690184000  | 13                                                | -1.379338000 | -1.232415000 | -2.227532000 |
| 13                                                                | 1.561615000  | -0.291998000 | 0.541115000  | 13                                                | 0.805405000  | 2.459810000  | -0.526961000 |
| 7                                                                 | 1.075786000  | -1.921420000 | -0.200980000 | 7                                                 | 0.274761000  | 2.637386000  | 1.234668000  |
| 13                                                                | 0.034217000  | -2.092355000 | 1.311359000  | 13                                                | -1.429026000 | 2.466265000  | 0.541585000  |
| 7                                                                 | 0.750809000  | -0.625574000 | 2.172818000  | 7                                                 | -0.900375000 | 2.638630000  | -1.220013000 |
| 13                                                                | -2.408539000 | 2.088655000  | -1.314077000 | 13                                                | 0.808346000  | -2.455849000 | -0.539396000 |
| 7                                                                 | -3.119490000 | 0.610638000  | -2.166580000 | 7                                                 | 0.277927000  | -2.642999000 | 1.221336000  |
| 13                                                                | -3.884704000 | 0.266678000  | -0.519898000 | 13                                                | -1.426090000 | -2.470257000 | 0.529154000  |
| 7                                                                 | -3.445567000 | 1.908560000  | 0.205326000  | 7                                                 | -0.897246000 | -2.633062000 | -1.233293000 |
| 6                                                                 | 4.619740000  | -0.067604000 | -0.101457000 | 7                                                 | 4.726831000  | 0.000769000  | 0.012356000  |
| 9                                                                 | 3.686441000  | -0.423915000 | 0.853855000  | 7                                                 | 5.814463000  | -0.000647000 | -0.024566000 |

|                                                    |              |              |              |                                                    |              |                           |
|----------------------------------------------------|--------------|--------------|--------------|----------------------------------------------------|--------------|---------------------------|
| 9                                                  | 4.066294000  | -0.326274000 | -1.268655000 |                                                    |              |                           |
| 17                                                 | 6.016751000  | -1.089035000 | 0.145257000  |                                                    |              |                           |
| 17                                                 | 4.959047000  | 1.630894000  | 0.064381000  |                                                    |              |                           |
| CHF <sub>3</sub> /Al <sub>12</sub> N <sub>12</sub> |              |              |              | OCS/Al <sub>12</sub> N <sub>12</sub>               |              |                           |
| 13                                                 | -0.075989000 | -2.637740000 | -0.043842000 | 13                                                 | 0.326800000  | -0.804106000 2.454381000  |
| 13                                                 | 1.836748000  | -2.035253000 | -1.499221000 | 13                                                 | -1.564067000 | 0.796801000 2.470673000   |
| 7                                                  | 1.753742000  | -2.773747000 | 0.190593000  | 7                                                  | -1.499815000 | -1.041675000 2.631624000  |
| 7                                                  | 0.031171000  | -2.228708000 | -1.844514000 | 7                                                  | 0.259991000  | 1.034261000 2.644622000   |
| 7                                                  | -1.236547000 | -1.940664000 | 1.111304000  | 7                                                  | 1.402858000  | -1.704130000 1.356931000  |
| 7                                                  | -1.415775000 | 0.640711000  | 1.957181000  | 7                                                  | 1.404385000  | -1.693758000 -1.367198000 |
| 13                                                 | -0.405370000 | -0.851103000 | 2.346266000  | 13                                                 | 0.463124000  | -2.510125000 -0.008648000 |
| 13                                                 | -2.051858000 | -0.375648000 | 0.543085000  | 13                                                 | 2.151761000  | -0.675652000 -0.000923000 |
| 13                                                 | -0.403943000 | 2.026615000  | 1.486566000  | 13                                                 | 0.329777000  | -0.785531000 -2.459337000 |
| 13                                                 | 1.507857000  | 2.645995000  | 0.037354000  | 13                                                 | -1.561268000 | 0.815272000 -2.465901000  |
| 7                                                  | 1.402372000  | 2.226525000  | 1.831834000  | 7                                                  | -1.496615000 | -1.021927000 -2.640369000 |
| 7                                                  | -0.320076000 | 2.776227000  | -0.202187000 | 7                                                  | 0.263065000  | 1.054166000 -2.635989000  |
| 7                                                  | 2.844152000  | -0.640063000 | -1.975141000 | 7                                                  | -2.634719000 | 1.704702000 1.367051000   |
| 7                                                  | 2.663282000  | 1.941501000  | -1.127499000 | 7                                                  | -2.633048000 | 1.714859000 -1.356555000  |
| 13                                                 | 3.406804000  | 0.359737000  | -0.525597000 | 13                                                 | -3.304123000 | 0.655354000 0.000903000   |
| 13                                                 | 1.840042000  | 0.857627000  | -2.376019000 | 13                                                 | -1.704518000 | 2.544408000 0.008899000   |
| 13                                                 | 2.361477000  | -1.669477000 | 1.454051000  | 13                                                 | -2.216672000 | -1.880211000 1.229507000  |
| 7                                                  | 1.332787000  | -0.864831000 | 2.758722000  | 7                                                  | -1.284459000 | -2.880318000 -0.011106000 |
| 13                                                 | 2.196174000  | 0.677107000  | 2.223870000  | 13                                                 | -2.215018000 | -1.870990000 -1.245395000 |
| 7                                                  | 3.439961000  | -0.194983000 | 1.169643000  | 7                                                  | -3.368076000 | -1.127664000 -0.005894000 |
| 13                                                 | -0.759069000 | -0.675951000 | -2.221929000 | 13                                                 | 0.973138000  | 1.872991000 1.240820000   |
| 7                                                  | -2.017903000 | 0.192960000  | -1.178654000 | 7                                                  | 2.127418000  | 1.130306000 0.005744000   |
| 13                                                 | -0.925835000 | 1.662551000  | -1.455345000 | 13                                                 | 0.974786000  | 1.882270000 -1.225147000  |
| 7                                                  | 0.099335000  | 0.864369000  | -2.768097000 | 7                                                  | 0.044584000  | 2.892782000 0.011080000   |
| 6                                                  | -4.899870000 | 0.021825000  | -0.315354000 | 6                                                  | 4.985849000  | 0.511431000 0.000645000   |
| 9                                                  | -4.081492000 | -0.548839000 | 0.674999000  | 8                                                  | 5.251750000  | 1.615557000 0.001398000   |
| 9                                                  | -6.004759000 | -0.689719000 | -0.312276000 | 16                                                 | 4.717097000  | -1.059408000 -0.000780000 |
| 9                                                  | -5.152309000 | 1.247878000  | 0.090219000  |                                                    |              |                           |
| 1                                                  | -4.340755000 | -0.007863000 | -1.246736000 |                                                    |              |                           |
| N <sub>2</sub> O/Al <sub>12</sub> N <sub>12</sub>  |              |              |              | AsH <sub>3</sub> /Al <sub>12</sub> N <sub>12</sub> |              |                           |
| 13                                                 | 0.466205000  | -0.833162000 | 2.451072000  | 13                                                 | 0.534366000  | 0.383159000 2.452859000   |
| 13                                                 | -1.381647000 | 0.817054000  | 2.473040000  | 13                                                 | -0.539106000 | -1.849712000 2.469235000  |
| 7                                                  | -1.365711000 | -1.022556000 | 2.631043000  | 7                                                  | 1.224002000  | -1.326087000 2.635393000  |
| 7                                                  | 0.448204000  | 1.006668000  | 2.645607000  | 7                                                  | -1.227787000 | -0.145083000 2.643876000  |
| 7                                                  | 1.518901000  | -1.754678000 | 1.351387000  | 7                                                  | 1.140741000  | 1.656080000 1.364722000   |
| 7                                                  | 1.517515000  | -1.738612000 | -1.373107000 | 7                                                  | 1.140741000  | 1.656080000 -1.364722000  |
| 13                                                 | 0.559805000  | -2.535280000 | -0.014961000 | 13                                                 | 2.147867000  | 0.939488000 0.000000000   |
| 13                                                 | 2.299454000  | -0.750915000 | -0.005516000 | 13                                                 | -0.040454000 | 2.159878000 0.000000000   |
| 13                                                 | 0.463822000  | -0.804074000 | -2.460675000 | 13                                                 | 0.534366000  | 0.383159000 -2.452859000  |
| 13                                                 | -1.383866000 | 0.846434000  | -2.462934000 | 13                                                 | -0.539106000 | -1.849712000 -2.469235000 |
| 7                                                  | -1.368073000 | -0.991284000 | -2.641880000 | 7                                                  | 1.224002000  | -1.326087000 -2.635393000 |
| 7                                                  | 0.445878000  | 1.037948000  | -2.634248000 | 7                                                  | -1.227787000 | -0.145083000 -2.643876000 |
| 7                                                  | -2.430682000 | 1.754035000  | 1.372867000  | 7                                                  | -1.143334000 | -3.114517000 1.362125000  |
| 7                                                  | -2.432141000 | 1.770151000  | -1.350811000 | 7                                                  | -1.143334000 | -3.114517000 -1.362125000 |
| 13                                                 | -3.128275000 | 0.724559000  | 0.005293000  | 13                                                 | 0.044905000  | -3.499039000 0.000000000  |
| 13                                                 | -1.480006000 | 2.571035000  | 0.015288000  | 13                                                 | -2.183156000 | -2.420829000 0.000000000  |
| 13                                                 | -2.103588000 | -1.839786000 | 1.227095000  | 13                                                 | 2.219707000  | -1.810826000 1.236913000  |
| 7                                                  | -1.197736000 | -2.859796000 | -0.016478000 | 7                                                  | 2.955775000  | -0.655158000 0.000000000  |
| 13                                                 | -2.104598000 | -1.825301000 | -1.247158000 | 13                                                 | 2.219707000  | -1.810826000 -1.236913000 |
| 7                                                  | -3.237944000 | -1.056189000 | -0.004990000 | 7                                                  | 1.788018000  | -3.116198000 0.000000000  |
| 13                                                 | 1.181746000  | 1.827070000  | 1.241493000  | 13                                                 | -2.206253000 | 0.339633000 1.230955000   |
| 7                                                  | 2.320124000  | 1.061511000  | 0.005172000  | 7                                                  | -1.770035000 | 1.636819000 0.000000000   |
| 13                                                 | 1.180977000  | 1.841864000  | -1.221397000 | 13                                                 | -2.206253000 | 0.339633000 -1.230955000  |
| 7                                                  | 0.277330000  | 2.874187000  | 0.016647000  | 7                                                  | -2.961095000 | -0.817582000 0.000000000  |

|                                                                 |              |              |              |                                                                 |              |              |              |
|-----------------------------------------------------------------|--------------|--------------|--------------|-----------------------------------------------------------------|--------------|--------------|--------------|
| 7                                                               | 4.997346000  | 0.030055000  | -0.000237000 | 33                                                              | 0.002071000  | 4.792483000  | 0.000000000  |
| 7                                                               | 5.612279000  | 0.946647000  | 0.005636000  | 1                                                               | -1.279141000 | 5.584131000  | 0.000000000  |
| 8                                                               | 4.356573000  | -0.990008000 | -0.006823000 | 1                                                               | 0.692887000  | 5.495588000  | -1.138223000 |
|                                                                 |              |              |              | 1                                                               | 0.692887000  | 5.495588000  | 1.138223000  |
| CH <sub>3</sub> Cl/Al <sub>12</sub> N <sub>12</sub>             |              |              |              | COCl <sub>2</sub> /Al <sub>12</sub> N <sub>12</sub>             |              |              |              |
| 13                                                              | -0.650045000 | 0.411617000  | -2.448268000 | 13                                                              | 1.790527000  | -0.720706000 | 0.010233000  |
| 13                                                              | 1.702401000  | -0.368514000 | -2.469681000 | 13                                                              | 0.383338000  | -1.242794000 | 2.008081000  |
| 7                                                               | 0.099545000  | -1.265717000 | -2.650191000 | 7                                                               | 0.877794000  | -2.249970000 | 0.549615000  |
| 7                                                               | 0.957471000  | 1.315447000  | -2.621456000 | 7                                                               | 1.487511000  | 0.182239000  | 1.625066000  |
| 7                                                               | -1.990808000 | 0.846746000  | -1.354309000 | 7                                                               | 1.488688000  | 0.070004000  | -1.586918000 |
| 7                                                               | -1.991211000 | 0.823688000  | 1.368967000  | 7                                                               | -0.756622000 | 1.124979000  | -2.723254000 |
| 13                                                              | -2.317761000 | -0.413732000 | -0.003205000 | 13                                                              | 0.010619000  | -0.545589000 | -2.495752000 |
| 13                                                              | -1.390461000 | 1.919356000  | 0.016553000  | 13                                                              | 0.548550000  | 1.650055000  | -1.523954000 |
| 13                                                              | -0.650167000 | 0.369303000  | 2.454542000  | 13                                                              | -2.397025000 | 1.226841000  | -2.034635000 |
| 13                                                              | 1.702200000  | -0.411526000 | 2.463018000  | 13                                                              | -3.686392000 | 0.651312000  | -0.001448000 |
| 7                                                               | 0.099325000  | -1.311405000 | 2.628769000  | 7                                                               | -3.485907000 | -0.208987000 | -1.624032000 |
| 7                                                               | 0.957630000  | 1.269665000  | 2.643463000  | 7                                                               | -2.878677000 | 2.220932000  | -0.552201000 |
| 7                                                               | 3.035554000  | -0.817212000 | -1.369323000 | 7                                                               | -1.254531000 | -1.149432000 | 2.720049000  |
| 7                                                               | 3.035437000  | -0.840392000 | 1.354798000  | 7                                                               | -3.508779000 | -0.101860000 | 1.606376000  |
| 13                                                              | 2.481927000  | -1.950607000 | -0.016949000 | 13                                                              | -2.564115000 | -1.691407000 | 1.537153000  |
| 13                                                              | 3.267889000  | 0.397140000  | 0.003198000  | 13                                                              | -2.019986000 | 0.516384000  | 2.510671000  |
| 13                                                              | -0.253162000 | -2.317593000 | -1.251119000 | 13                                                              | -0.524365000 | -2.682377000 | -0.456460000 |
| 7                                                               | -1.591720000 | -2.058306000 | -0.016931000 | 7                                                               | -0.882832000 | -2.053776000 | -2.159250000 |
| 13                                                              | -0.253180000 | -2.340396000 | 1.212562000  | 13                                                              | -2.571868000 | -1.737931000 | -1.484144000 |
| 7                                                               | 0.991632000  | -2.927309000 | -0.024719000 | 7                                                               | -2.297827000 | -2.682885000 | 0.078662000  |
| 13                                                              | 1.321208000  | 2.353458000  | -1.217664000 | 13                                                              | 0.557804000  | 1.691970000  | 1.478645000  |
| 7                                                               | 0.082494000  | 2.928142000  | 0.025315000  | 7                                                               | 0.293813000  | 2.664354000  | -0.075065000 |
| 13                                                              | 1.321589000  | 2.330819000  | 1.257378000  | 13                                                              | -1.476886000 | 2.669241000  | 0.459049000  |
| 7                                                               | 2.669511000  | 2.078795000  | 0.017273000  | 7                                                               | -1.132898000 | 2.023027000  | 2.154096000  |
| 6                                                               | -5.084708000 | 1.122608000  | 0.010107000  | 6                                                               | 4.653334000  | -0.209597000 | 0.005424000  |
| 1                                                               | -4.628584000 | 1.518071000  | 0.913846000  | 17                                                              | 4.385461000  | 1.475794000  | -0.044877000 |
| 17                                                              | -4.719037000 | -0.648914000 | -0.006816000 | 17                                                              | 6.296499000  | -0.691026000 | 0.017078000  |
| 1                                                               | -6.165598000 | 1.216489000  | 0.011626000  | 8                                                               | 3.773239000  | -1.019857000 | 0.031413000  |
| 1                                                               | -4.629661000 | 1.535125000  | -0.886574000 |                                                                 |              |              |              |
| C <sub>2</sub> H <sub>2</sub> /Al <sub>12</sub> N <sub>12</sub> |              |              |              | C <sub>2</sub> H <sub>4</sub> /Al <sub>12</sub> N <sub>12</sub> |              |              |              |
| 13                                                              | 2.592980000  | 0.089310000  | -0.004118000 | 13                                                              | 2.555245000  | 0.001142000  | -0.013059000 |
| 13                                                              | 1.275306000  | 2.220778000  | -0.019738000 | 13                                                              | 1.303241000  | 0.007044000  | -2.182175000 |
| 7                                                               | 2.044044000  | 1.258694000  | 1.348242000  | 7                                                               | 2.034816000  | 1.368479000  | -1.179756000 |
| 7                                                               | 2.040441000  | 1.236451000  | -1.373803000 | 7                                                               | 2.036135000  | -1.359724000 | -1.187902000 |
| 7                                                               | 2.157739000  | -1.667338000 | 0.010041000  | 7                                                               | 2.069123000  | -0.004317000 | 1.726771000  |
| 7                                                               | -0.243570000 | -2.961767000 | 0.023795000  | 7                                                               | -0.364783000 | -0.009059000 | 2.962651000  |
| 13                                                              | 0.878085000  | -2.147029000 | 1.247634000  | 13                                                              | 0.777823000  | 1.224013000  | 2.190799000  |
| 13                                                              | 0.874192000  | -2.166018000 | -1.215910000 | 13                                                              | 0.779111000  | -1.236712000 | 2.183900000  |
| 13                                                              | -1.881276000 | -2.257647000 | 0.020218000  | 13                                                              | -1.981984000 | -0.007292000 | 2.213829000  |
| 13                                                              | -3.058558000 | -0.080429000 | 0.004181000  | 13                                                              | -3.098996000 | -0.001093000 | 0.004528000  |
| 7                                                               | -2.617030000 | -1.238611000 | 1.375238000  | 7                                                               | -2.693270000 | 1.357552000  | 1.189701000  |
| 7                                                               | -2.620282000 | -1.260410000 | -1.349144000 | 7                                                               | -2.692129000 | -1.366539000 | 1.181547000  |
| 7                                                               | -0.351538000 | 2.958605000  | -0.023577000 | 7                                                               | -0.306688000 | 0.008819000  | -2.958110000 |
| 7                                                               | -2.754441000 | 1.677767000  | -0.010309000 | 7                                                               | -2.745738000 | 0.004213000  | -1.744882000 |
| 13                                                              | -1.469442000 | 2.179114000  | 1.221273000  | 13                                                              | -1.449905000 | 1.242974000  | -2.197665000 |
| 13                                                              | -1.472595000 | 2.159769000  | -1.253076000 | 13                                                              | -1.448789000 | -1.230644000 | -2.204843000 |
| 13                                                              | 0.804041000  | 0.605753000  | 2.448138000  | 13                                                              | 0.772094000  | 2.455092000  | -0.547986000 |
| 7                                                               | 0.354950000  | -1.177051000 | 2.650900000  | 7                                                               | 0.276900000  | 2.639119000  | 1.223864000  |
| 13                                                              | -1.379495000 | -0.567558000 | 2.474705000  | 13                                                              | -1.440428000 | 2.466875000  | 0.565698000  |
| 7                                                               | -0.934882000 | 1.218145000  | 2.625981000  | 7                                                               | -0.948220000 | 2.638518000  | -1.206278000 |
| 13                                                              | 0.797737000  | 0.566584000  | -2.460395000 | 13                                                              | 0.774435000  | -2.451268000 | -0.562595000 |
| 7                                                               | 0.347832000  | -1.219148000 | -2.633565000 | 7                                                               | 0.279387000  | -2.646246000 | 1.208241000  |
| 13                                                              | -1.385981000 | -0.606721000 | -2.462623000 | 13                                                              | -1.438045000 | -2.470773000 | 0.551151000  |

|                                                    |              |              |              |                                                    |              |              |              |
|----------------------------------------------------|--------------|--------------|--------------|----------------------------------------------------|--------------|--------------|--------------|
| 7                                                  | -0.941727000 | 1.176293000  | -2.643574000 | 7                                                  | -0.945844000 | -2.631619000 | -1.221778000 |
| 6                                                  | 4.946869000  | 0.604627000  | 0.000528000  | 6                                                  | 4.915209000  | 0.670296000  | 0.002384000  |
| 6                                                  | 4.931853000  | -0.598596000 | -0.001476000 | 6                                                  | 4.915471000  | -0.668548000 | -0.002822000 |
| 1                                                  | 4.886532000  | -1.665349000 | -0.002585000 | 1                                                  | 4.817102000  | -1.228690000 | 0.922392000  |
| 1                                                  | 4.995455000  | 1.670980000  | 0.002950000  | 1                                                  | 4.816626000  | 1.223197000  | 0.931940000  |
|                                                    |              |              |              | 1                                                  | 5.017653000  | -1.235760000 | -0.920244000 |
|                                                    |              |              |              | 1                                                  | 5.017268000  | 1.244734000  | -0.910496000 |
| H <sub>2</sub> Se/Al <sub>12</sub> N <sub>12</sub> |              |              |              | H <sub>2</sub> S/Al <sub>12</sub> N <sub>12</sub>  |              |              |              |
| 13                                                 | 2.165713000  | -0.013542000 | 0.013598000  | 13                                                 | 2.506625000  | -0.128768000 | -0.005479000 |
| 13                                                 | 0.927571000  | -0.060588000 | -2.164150000 | 13                                                 | 1.265327000  | 0.150966000  | -2.164049000 |
| 7                                                  | 1.661396000  | 1.326353000  | -1.198609000 | 7                                                  | 2.056543000  | 1.376685000  | -1.036917000 |
| 7                                                  | 1.649193000  | -1.401781000 | -1.130623000 | 7                                                  | 1.934633000  | -1.335632000 | -1.311177000 |
| 7                                                  | 1.663152000  | 0.039139000  | 1.748354000  | 7                                                  | 2.010378000  | -0.270953000 | 1.726146000  |
| 7                                                  | -0.780133000 | 0.076245000  | 2.961623000  | 7                                                  | -0.429279000 | -0.295710000 | 2.947775000  |
| 13                                                 | 0.372465000  | 1.283573000  | 2.164509000  | 13                                                 | 0.766699000  | 0.957825000  | 2.301123000  |
| 13                                                 | 0.366921000  | -1.177587000 | 2.228306000  | 13                                                 | 0.669779000  | -1.490001000 | 2.057546000  |
| 13                                                 | -2.390828000 | 0.061781000  | 2.199206000  | 13                                                 | -2.040440000 | -0.153145000 | 2.199671000  |
| 13                                                 | -3.490257000 | 0.008891000  | -0.018025000 | 13                                                 | -3.144117000 | 0.114950000  | 0.000006000  |
| 7                                                  | -3.088949000 | 1.399790000  | 1.130912000  | 7                                                  | -2.687482000 | 1.334211000  | 1.311854000  |
| 7                                                  | -3.098240000 | -1.323624000 | 1.200671000  | 7                                                  | -2.801955000 | -1.373860000 | 1.039279000  |
| 7                                                  | -0.674736000 | -0.075066000 | -2.955836000 | 7                                                  | -0.337544000 | 0.296525000  | -2.940779000 |
| 7                                                  | -3.123622000 | -0.037139000 | -1.764021000 | 7                                                  | -2.782397000 | 0.275480000  | -1.740352000 |
| 13                                                 | -1.819507000 | 1.183753000  | -2.240729000 | 13                                                 | -1.433979000 | 1.497189000  | -2.067964000 |
| 13                                                 | -1.826627000 | -1.289378000 | -2.176728000 | 13                                                 | -1.533730000 | -0.962669000 | -2.314138000 |
| 13                                                 | 0.395332000  | 2.432754000  | -0.609104000 | 13                                                 | 0.830554000  | 2.444465000  | -0.307041000 |
| 7                                                  | -0.114468000 | 2.671871000  | 1.152637000  | 7                                                  | 0.333795000  | 2.480062000  | 1.474367000  |
| 13                                                 | -1.826721000 | 2.486001000  | 0.485412000  | 13                                                 | -1.385813000 | 2.444681000  | 0.800349000  |
| 7                                                  | -1.319481000 | 2.605609000  | -1.286354000 | 7                                                  | -0.876978000 | 2.767004000  | -0.945566000 |
| 13                                                 | 0.380012000  | -2.471034000 | -0.483244000 | 13                                                 | 0.628417000  | -2.431325000 | -0.796500000 |
| 7                                                  | -0.131730000 | -2.611377000 | 1.288353000  | 7                                                  | 0.114113000  | -2.772720000 | 0.946901000  |
| 13                                                 | -1.842425000 | -2.449424000 | 0.612397000  | 13                                                 | -1.589747000 | -2.462398000 | 0.307108000  |
| 7                                                  | -1.336800000 | -2.663742000 | -1.150862000 | 7                                                  | -1.095406000 | -2.472502000 | -1.472189000 |
| 34                                                 | 4.786564000  | -0.053014000 | 0.014742000  | 16                                                 | 4.989265000  | -0.092500000 | -0.002704000 |
| 1                                                  | 4.903818000  | 1.247114000  | 0.687669000  | 1                                                  | 5.051977000  | 0.872345000  | 0.931289000  |
| 1                                                  | 4.862505000  | 0.573825000  | -1.311463000 | 1                                                  | 5.036323000  | 0.784510000  | -1.021621000 |
| PH <sub>3</sub> /Al <sub>12</sub> N <sub>12</sub>  |              |              |              | COF <sub>2</sub> /Al <sub>12</sub> N <sub>12</sub> |              |              |              |
| 13                                                 | 0.717260000  | -2.455746000 | -0.537465000 | 13                                                 | -2.117388000 | -0.714947000 | -0.016898000 |
| 13                                                 | -1.528605000 | -2.464906000 | 0.508772000  | 13                                                 | -0.729357000 | -1.160866000 | -2.042976000 |
| 7                                                  | -0.984700000 | -2.623921000 | -1.248829000 | 7                                                  | -1.213514000 | -2.222206000 | -0.617713000 |
| 7                                                  | 0.166203000  | -2.655001000 | 1.216786000  | 7                                                  | -1.834553000 | 0.247769000  | -1.600002000 |
| 7                                                  | 2.005256000  | -1.373185000 | -1.121392000 | 7                                                  | -1.822204000 | 0.026790000  | 1.603507000  |
| 7                                                  | 2.022426000  | 1.358151000  | -1.103461000 | 7                                                  | 0.430453000  | 1.044852000  | 2.761252000  |
| 13                                                 | 1.309494000  | 0.003502000  | -2.126339000 | 13                                                 | -0.335739000 | -0.616904000 | 2.482319000  |
| 13                                                 | 2.508347000  | -0.019084000 | 0.075727000  | 13                                                 | -0.882244000 | 1.610292000  | 1.588779000  |
| 13                                                 | 0.747667000  | 2.448295000  | -0.504829000 | 13                                                 | 2.067551000  | 1.173903000  | 2.068306000  |
| 13                                                 | -1.497939000 | 2.472019000  | 0.541717000  | 13                                                 | 3.349199000  | 0.668815000  | 0.011496000  |
| 7                                                  | -0.951913000 | 2.647558000  | -1.213665000 | 7                                                  | 3.156300000  | -0.246380000 | 1.604676000  |
| 7                                                  | 0.199212000  | 2.631250000  | 1.251987000  | 7                                                  | 2.543160000  | 2.218029000  | 0.618653000  |
| 7                                                  | -2.794255000 | -1.354592000 | 1.105361000  | 7                                                  | 0.904753000  | -1.041253000 | -2.757911000 |
| 7                                                  | -2.777206000 | 1.369572000  | 1.123632000  | 7                                                  | 3.163333000  | -0.029324000 | -1.620359000 |
| 13                                                 | -3.155329000 | 0.017752000  | -0.078408000 | 13                                                 | 2.221813000  | -1.621527000 | -1.601426000 |
| 13                                                 | -2.104701000 | -0.003756000 | 2.162888000  | 13                                                 | 1.669888000  | 0.617815000  | -2.496256000 |
| 13                                                 | -1.447521000 | -1.215391000 | -2.240560000 | 13                                                 | 0.195093000  | -2.685648000 | 0.366688000  |
| 7                                                  | -0.275116000 | 0.018967000  | -2.954139000 | 7                                                  | 0.557407000  | -2.111226000 | 2.087052000  |
| 13                                                 | -1.431916000 | 1.258211000  | -2.224124000 | 13                                                 | 2.244049000  | -1.770698000 | 1.416717000  |
| 7                                                  | -2.750330000 | 0.026892000  | -1.816526000 | 7                                                  | 1.964786000  | -2.662952000 | -0.176373000 |
| 13                                                 | 0.648092000  | -1.252081000 | 2.210987000  | 13                                                 | -0.905187000 | 1.754357000  | -1.408733000 |
| 7                                                  | 1.957778000  | -0.026743000 | 1.798265000  | 7                                                  | -0.629869000 | 2.670823000  | 0.174858000  |

|                                                                    |              |              |              |                                                                   |              |              |              |
|--------------------------------------------------------------------|--------------|--------------|--------------|-------------------------------------------------------------------|--------------|--------------|--------------|
| 13                                                                 | 0.663355000  | 1.209095000  | 2.227099000  | 13                                                                | 1.135611000  | 2.697720000  | -0.369927000 |
| 7                                                                  | -0.511044000 | -0.019154000 | 2.960125000  | 7                                                                 | 0.781220000  | 2.108814000  | -2.083938000 |
| 15                                                                 | 5.016795000  | -0.000696000 | -0.002563000 | 6                                                                 | -4.887426000 | -0.063663000 | -0.002139000 |
| 1                                                                  | 5.746679000  | -1.050779000 | 0.580058000  | 9                                                                 | -4.564660000 | 1.176537000  | 0.077429000  |
| 1                                                                  | 5.701418000  | 1.092292000  | 0.555489000  | 9                                                                 | -6.165040000 | -0.204592000 | -0.024336000 |
| 1                                                                  | 5.589148000  | -0.002472000 | -1.285173000 | 8                                                                 | -4.123724000 | -0.971467000 | -0.049508000 |
| CH <sub>3</sub> F/Al <sub>12</sub> N <sub>12</sub>                 |              |              |              | HCHO/Al <sub>12</sub> N <sub>12</sub>                             |              |              |              |
| 13                                                                 | -0.572049000 | -2.054025000 | -1.564512000 | 13                                                                | -2.550001000 | -0.465745000 | 0.079670000  |
| 13                                                                 | 1.444116000  | -0.874014000 | -2.390459000 | 13                                                                | -1.492037000 | 0.704637000  | -1.879964000 |
| 7                                                                  | 1.233816000  | -2.444260000 | -1.442734000 | 7                                                                 | -1.946600000 | -1.049450000 | -1.591486000 |
| 7                                                                  | -0.348164000 | -0.693916000 | -2.799460000 | 7                                                                 | -2.315605000 | 1.366348000  | -0.365523000 |
| 7                                                                  | -1.747343000 | -2.069877000 | -0.230569000 | 7                                                                 | -1.864315000 | -1.135098000 | 1.608654000  |
| 7                                                                  | -1.818182000 | -0.442620000 | 1.954572000  | 7                                                                 | 0.655374000  | -1.300144000 | 2.639575000  |
| 13                                                                 | -0.914930000 | -1.950898000 | 1.407116000  | 13                                                                | -0.396620000 | -2.226760000 | 1.428632000  |
| 13                                                                 | -2.474790000 | -0.412922000 | 0.209098000  | 13                                                                | -0.707166000 | -0.052635000 | 2.534705000  |
| 13                                                                 | -0.696954000 | 0.872041000  | 2.374291000  | 13                                                                | 2.177583000  | -0.716800000 | 1.921848000  |
| 13                                                                 | 1.318862000  | 2.069082000  | 1.572613000  | 13                                                                | 3.064627000  | 0.434533000  | -0.082322000 |
| 7                                                                  | 1.098865000  | 0.699558000  | 2.790668000  | 7                                                                 | 2.952836000  | -1.353078000 | 0.368426000  |
| 7                                                                  | -0.482729000 | 2.457434000  | 1.443486000  | 7                                                                 | 2.606577000  | 1.053389000  | 1.597567000  |
| 7                                                                  | 2.559144000  | 0.454156000  | -1.962854000 | 7                                                                 | 0.016202000  | 1.303586000  | -2.628634000 |
| 7                                                                  | 2.488932000  | 2.078135000  | 0.223105000  | 7                                                                 | 2.547023000  | 1.152797000  | -1.632493000 |
| 13                                                                 | 3.104186000  | 0.386613000  | -0.197608000 | 13                                                                | 1.375090000  | 0.055054000  | -2.551441000 |
| 13                                                                 | 1.664680000  | 1.979903000  | -1.428340000 | 13                                                                | 1.066770000  | 2.242460000  | -1.438225000 |
| 13                                                                 | 1.840985000  | -2.322888000 | 0.230689000  | 13                                                                | -0.505176000 | -2.094079000 | -1.563661000 |
| 7                                                                  | 0.795978000  | -2.340552000 | 1.752167000  | 7                                                                 | 0.186830000  | -2.967419000 | -0.088066000 |
| 13                                                                 | 1.776400000  | -0.847750000 | 2.215867000  | 13                                                                | 1.792455000  | -2.253144000 | -0.649432000 |
| 7                                                                  | 3.020774000  | -1.046088000 | 0.862385000  | 7                                                                 | 1.152461000  | -1.694082000 | -2.289797000 |
| 13                                                                 | -1.028949000 | 0.844001000  | -2.203844000 | 13                                                                | -1.124214000 | 2.234447000  | 0.640830000  |
| 7                                                                  | -2.273331000 | 1.043357000  | -0.855701000 | 7                                                                 | -0.487330000 | 1.703874000  | 2.292881000  |
| 13                                                                 | -1.088891000 | 2.311172000  | -0.228164000 | 13                                                                | 1.166004000  | 2.108514000  | 1.577409000  |
| 7                                                                  | -0.049090000 | 2.347103000  | -1.755976000 | 7                                                                 | 0.485332000  | 2.962154000  | 0.086402000  |
| 6                                                                  | -5.315254000 | 0.461325000  | -0.206091000 | 6                                                                 | -5.186184000 | 0.447679000  | -0.104526000 |
| 1                                                                  | -4.710085000 | 1.131701000  | -0.811585000 | 1                                                                 | -6.277332000 | 0.355548000  | -0.096069000 |
| 9                                                                  | -4.422126000 | -0.564810000 | 0.257814000  | 1                                                                 | -4.687842000 | 1.407797000  | -0.293879000 |
| 1                                                                  | -5.709164000 | 0.938337000  | 0.686255000  | 8                                                                 | -4.514290000 | -0.545730000 | 0.099991000  |
| 1                                                                  | -6.085452000 | -0.055796000 | -0.769797000 |                                                                   |              |              |              |
| (CH <sub>3</sub> ) <sub>2</sub> O/Al <sub>12</sub> N <sub>12</sub> |              |              |              | CH <sub>3</sub> NH <sub>2</sub> /Al <sub>12</sub> N <sub>12</sub> |              |              |              |
| 13                                                                 | -2.389184000 | 0.020680000  | 0.184656000  | 13                                                                | 0.344867000  | -2.646898000 | -0.014722000 |
| 13                                                                 | -1.152594000 | 1.940726000  | -0.872344000 | 13                                                                | -1.794366000 | -2.091789000 | 1.106920000  |
| 7                                                                  | -1.943747000 | 0.449892000  | -1.600319000 | 7                                                                 | -1.415809000 | -2.712766000 | -0.590229000 |
| 7                                                                  | -1.797917000 | 1.682866000  | 0.830664000  | 7                                                                 | -0.092254000 | -2.374554000 | 1.763389000  |
| 7                                                                  | -1.830255000 | -1.547984000 | 0.905107000  | 7                                                                 | 1.722273000  | -1.930170000 | -0.883752000 |
| 7                                                                  | 0.633012000  | -2.649688000 | 1.318298000  | 7                                                                 | 2.115365000  | 0.709427000  | -1.488034000 |
| 13                                                                 | -0.590453000 | -2.500337000 | -0.061600000 | 13                                                                | 1.142734000  | -0.712167000 | -2.134171000 |
| 13                                                                 | -0.470022000 | -1.406795000 | 2.136408000  | 13                                                                | 2.527163000  | -0.446423000 | -0.050701000 |
| 13                                                                 | 2.227751000  | -1.982110000 | 0.889804000  | 13                                                                | 1.042662000  | 2.074996000  | -1.100097000 |
| 13                                                                 | 3.290217000  | -0.009008000 | -0.160411000 | 13                                                                | -1.090044000 | 2.669484000  | 0.012540000  |
| 7                                                                  | 2.841011000  | -1.672981000 | -0.827312000 | 7                                                                 | -0.663318000 | 2.373310000  | -1.759240000 |
| 7                                                                  | 2.986263000  | -0.456265000 | 1.606504000  | 7                                                                 | 0.662918000  | 2.725368000  | 0.591068000  |
| 7                                                                  | 0.431110000  | 2.642047000  | -1.317146000 | 7                                                                 | -2.850201000 | -0.701794000 | 1.488467000  |
| 7                                                                  | 2.897999000  | 1.557441000  | -0.920254000 | 7                                                                 | -2.460941000 | 1.926857000  | 0.884828000  |
| 13                                                                 | 1.525788000  | 1.413703000  | -2.152151000 | 13                                                                | -3.112025000 | 0.416797000  | 0.040631000  |
| 13                                                                 | 1.655329000  | 2.516760000  | 0.058264000  | 13                                                                | -1.903830000 | 0.728744000  | 2.178338000  |
| 13                                                                 | -0.722387000 | -0.593928000 | -2.366389000 | 13                                                                | -1.756729000 | -1.501114000 | -1.853583000 |
| 7                                                                  | -0.191009000 | -2.269283000 | -1.786269000 | 7                                                                 | -0.483734000 | -0.642512000 | -2.876836000 |
| 13                                                                 | 1.514999000  | -1.604505000 | -2.022892000 | 13                                                                | -1.404700000 | 0.884292000  | -2.403262000 |
| 7                                                                  | 0.970468000  | -0.091769000 | -2.930965000 | 7                                                                 | -2.844809000 | -0.016081000 | -1.670101000 |
| 13                                                                 | -0.463657000 | 1.596275000  | 2.006108000  | 13                                                                | 0.651245000  | -0.874515000 | 2.386167000  |



|    |              |              |              |    |              |              |              |
|----|--------------|--------------|--------------|----|--------------|--------------|--------------|
| 7  | 0.084967000  | 0.092139000  | 2.933555000  | 7  | 2.080359000  | 0.019252000  | 1.651481000  |
| 13 | 1.773602000  | 0.598648000  | 2.386756000  | 13 | 1.000374000  | 1.494222000  | 1.840500000  |
| 7  | 1.250984000  | 2.261217000  | 1.776427000  | 7  | -0.272114000 | 0.650511000  | 2.887581000  |
| 8  | -4.306015000 | 0.024284000  | 0.287224000  | 7  | 4.508812000  | -0.660769000 | -0.089537000 |
| 6  | -4.982290000 | -1.202057000 | -0.024980000 | 1  | 4.794846000  | -1.297674000 | 0.651271000  |
| 1  | -4.382343000 | -1.998173000 | 0.410994000  | 1  | 4.777996000  | -1.090543000 | -0.972248000 |
| 1  | -5.977327000 | -1.173782000 | 0.420501000  | 6  | 5.171809000  | 0.656050000  | 0.079615000  |
| 1  | -5.049174000 | -1.314603000 | -1.110053000 | 1  | 4.830842000  | 1.305013000  | -0.725935000 |
| 6  | -4.969447000 | 1.200071000  | -0.200886000 | 1  | 4.845965000  | 1.072514000  | 1.032247000  |
| 1  | -5.985234000 | 1.214940000  | 0.195750000  | 1  | 6.258089000  | 0.568669000  | 0.062103000  |
| 1  | -4.398584000 | 2.047334000  | 0.174289000  |    |              |              |              |
| 1  | -4.971056000 | 1.187078000  | -1.292841000 |    |              |              |              |

## References

- S1. Geetha Sadasivan Nair, R.; Narayanan Nair, A. K.; Sun, S. Adsorption of gases on fullerene-like  $X_{12}Y_{12}$  ( $X = \text{Be, Mg, Ca, B, Al, Ga, C; Y = C, Si, N, P, O}$ ) nanocages. *Energy Fuels* **2023**, *37* (18), 14053-14063
